1 **Oct1 recruits the histone lysine demethylase Utx to canalize**  
2 **lineage specification**

3  
4 **Jelena Perovanovic<sup>1,3</sup>, Yifan Wu<sup>1,3</sup>, Zuolian Shen<sup>1,3</sup>, Erik Hughes<sup>1,3</sup>, Mahesh B.**  
5 **Chandrasekharan<sup>2,3</sup>, Dean Tantin<sup>1,3,\*</sup>**

6  
7  
8 <sup>1</sup>Department of Pathology

9 <sup>2</sup>Department of Radiation Oncology

10 <sup>3</sup>Huntsman Cancer Institute, University of Utah School of Medicine, Salt Lake City, UT 84112  
11 U.S.A.

12  
13  
14  
15 \*Correspondence

16 [dean.tantin@path.utah.edu](mailto:dean.tantin@path.utah.edu)

17  
18  
19 Short title: Oct1 mediates gene bivalency resolution

20  
21 Key words: pre-implantation development; embryonic stem cells; single-cell RNA sequencing;  
22 Oct1/Pou2f1; Utx/Kmd3a

23  
24  
25  
26  
27 Characters in title (including spaces): 82

28 Words in abstract: 150

29 Character count (including spaces and main legends but excluding STAR methods,

30 Supplemental item legends and References): 66,316

31 Total main figures and tables: 7

32 **HIGHLIGHTS**

- 33 • Oct1 “canalizes” gene expression to promote developmentally accurate gene expression  
34 and differentiation
- 35 • Oct1 is necessary for proper bivalency resolution
- 36 • Oct1 recruits Utx to demethylate H3K27me3 at mesoderm lineage-appropriate targets
- 37

38 **SUMMARY**

39 **The pathways used by cells to transition between undifferentiated, pluripotent state and**  
40 **tissue-specific states are incompletely understood. Here we show that the transcription**  
41 **factor Oct1/Pou2f1 activates silent, developmental lineage-appropriate genes to “canalize”**  
42 **developmental progression. Using inducible knockout embryonic stem cells and single-**  
43 **cell gene expression profiling, we show that Oct1 deficiency impairs mesodermal**  
44 **differentiation. Oct1-deficient cells show inappropriate developmental lineage branching**  
45 **and display a poorly differentiated state with hallmarks of pluripotency. Like Oct4, Oct1**  
46 **directly binds genes critical for mesoderm induction and chromatin modification. Oct1**  
47 **recruits the Utx/Kdm3a histone lysine demethylase to remove inhibitory H3K27me3 marks**  
48 **and activate their expression. The specificity of the ubiquitous Oct1 protein for**  
49 **mesodermal genes is explained by cooperative interactions with the Smad3 transcription**  
50 **factor. We also show that ectopic Oct1 expression improves the ability of cells to**  
51 **differentiate accurately under mesoderm lineage-inducing conditions. Overall, these**  
52 **results identify Oct1 as a key regulator of mesoderm differentiation.**

## 53 INTRODUCTION

54

55 Lineage specification is a key process in the development of multicellular organisms by which  
56 undifferentiated cells progressively acquire tissue- and cell type-specific features (Seydoux and  
57 Braun, 2006). It is dynamically regulated, requiring extensive transcriptional and epigenetic  
58 remodeling to selectively activate lineage-appropriate gene expression programs and stably  
59 repress the expression of genes specific for alternative lineages. Embryonic stem cells (ESCs)  
60 represent a pluripotent cell type capable of both self-renewal and differentiation into all three germ  
61 layers (Beddington and Robertson, 1989). The three germ layers are established during  
62 gastrulation – a spatial reorganization of the embryo from a single-layer epiblast into a  
63 multilayered organism. One of the germ layers – mesoderm (MD) – gives rise to dermomyotome  
64 (muscle and dermis), sclerotome (axial skeleton) and lateral MD (cardiac) among other tissue  
65 types.

66 The transcriptional changes underlying lineage specification require extensive chromatin  
67 remodeling and spatiotemporal activation of genes encoding master transcription factors.  
68 Remodeling is potentiated by a unique chromatin landscape in pluripotent cells. Chromatin in  
69 ESCs is largely accessible and lacks stable heterochromatin domains (Meshorer and Misteli,  
70 2006; Schlesinger and Meshorer, 2019). A large number of genes encoding lineage-specific  
71 developmental regulators are marked at promoters and gene bodies by covalently modified  
72 nucleosomes that simultaneously convey activating (H3K4me3) and repressing (H3K27me3)  
73 potential (Bernstein et al., 2006; Ku et al., 2008). In ESCs, these “bivalent” genes are silent or  
74 expressed at low levels, but poised for activation. During development, gene bivalency resolves  
75 via either removal of activating marks and gene silencing, or removal of repressive marks and  
76 gene activation. Which bivalent genes resolve in which direction is lineage-specific, resulting in  
77 distinct, cell fate-appropriate transcription programs and durable repression of lineage-  
78 inappropriate genes. However, the programs that instruct correct bivalency resolution are poorly  
79 understood.

80 POU transcription factors play central roles in the regulation of development (Tantin,  
81 2013). The well-known POU factor Oct4 (encoded by *Pou5f1*) is a master regulator of the  
82 induction and maintenance of pluripotency (Nichols et al., 1998; Palmieri et al., 1994; Takahashi  
83 and Yamanaka, 2006). Oct4 associates with bivalent genes in ESCs (Bernstein et al., 2006), but  
84 is rapidly silenced in their differentiated progeny before bivalency resolution and the induction of  
85 tissue- and cell type-specific gene expression. A second POU protein, Oct1, is co-expressed with

86 Oct4, but unlike Oct4 is expressed beyond pluripotency (Shen et al., 2017). Oct1 is widely  
87 expressed and required for placental and embryonic development (Sebastiano et al., 2010; Wang  
88 et al., 2004). Circumventing the placental defects via tetraploid complementation results in  
89 developmental arrest at E8.25 with no more than five somites (Sebastiano et al., 2010). Oct1-  
90 deficient ESCs are morphologically normal and show appropriate self-renewal and growth  
91 characteristics, but upon differentiation show phenotypic and gene expression defects including  
92 decreased developmental lineage-specific gene expression coupled with elevated expression of  
93 developmentally incorrect genes (Shen et al., 2017). The underlying molecular mechanisms by  
94 which Oct1 regulates lineage differentiation are unknown.

95         Here, using MD differentiation of *Oct1/Pou2f1* inducible-conditional ESCs, we show that  
96 Oct1 “canalizes” lineage specification by directly de-repressing lineage-specific bivalent genes.  
97 Oct1 is needed for consequent early MD development and adoption of terminal MD phenotypes.  
98 In the absence of Oct1, differentiating cells show “fuzzy” differentiation programs and increased  
99 predilection to proceed down incorrect developmental trajectories. We show that Oct1 interacts  
100 with components of the Utx (Kdm3a) H3K27me3 demethylase complex, and recruits Utx to  
101 developmentally appropriate target genes to facilitate bivalency resolution. Binding sites for Oct1  
102 and Oct4 in pluripotent cells in which Oct1 binding is carried forward during MD differentiation are  
103 also enriched in sites for Smad transcription factors, key mediators of MD specification. Oct1 and  
104 Smad3 interact in differentiating cells, providing a means of restricting Oct1’s bivalency-resolving  
105 potential to MD-specific genes. Finally, we show that ectopic Oct1 expression increases MD  
106 developmental specification, suggesting an application in improving the specificity of  
107 developmental outcomes in differentiating ESCs or iPSCs.

## 108 RESULTS

109

### 110 Loss of Oct1 Causes Aberrant Mesodermal Differentiation

111 To identify how Oct1 loss perturbs cells during differentiation, we performed single-cell RNA-seq  
112 (scRNA-seq) using an MD differentiation protocol that results in terminally-differentiated  
113 myotubes after 3 weeks of culture. The differentiation process is initiated by Bmp4 treatment to  
114 activate TGF $\beta$  signaling, and generates dynamic changes in metabolic programs (Oginuma et al.,  
115 2017), epithelial-to-mesenchymal transition (EMT) (Diaz-Cuadros et al., 2020) and induction of  
116 MD-specific gene expression programs during the differentiation timecourse (Chal et al., 2015).  
117 Cells were collected at day 0 (D0, pluripotent ESCs), D3 and D6 of differentiation to identify  
118 changes in populations and gene expression patterns early in the differentiation timecourse. Data  
119 from the different conditions were subjected to graph-based clustering approach and uniform  
120 manifold approximation and projection (UMAP) to visualize clusters of cells with similar gene  
121 expression. Integrated analysis of Oct1-sufficient *Pou2f1<sup>fl/fl</sup>;Rosa26-CreERT<sup>2</sup>;LSL-YFP*  
122 conditional ESCs (hereafter, “parental” cells) at the three timepoints identifies a range of cell  
123 populations, from ESC-like to neuromesodermal, paraxial MD and early somite (Figure 1A).  
124 These populations recapitulate developmental stages associated with induction of markers  
125 associated with early MD (*Fgf17* and *Tbxt/T/Brachyury*; cluster 2 and 7), neuromesoderm (*Hoxc9*,  
126 *Pax3*, *Sox2*), paraxial MD (*Meox1*, *Twist1*, *Pax3*) and early somite and neuronal progenitors  
127 (*Cxcr4*, *Uncx*) (Figure 1B, Figure S1 and not shown). These results provide a single cell-resolution  
128 map of early MD differentiation.

129 Next, we compared the parental controls to tamoxifen-treated, Oct1-deficient cells  
130 (hereafter, “cKO”) to identify changes in cell populations and gene expression (Table S1). D0 and  
131 D3 cKO cells show few differences from parental, Oct1 sufficient cells (not shown). In contrast,  
132 D6 cKO cells show poor mesodermal differentiation capacity with reductions in key mesodermal  
133 clusters. For example, parental cell populations characterized by neuromesodermal and paraxial  
134 MD gene expression represent the largest two clusters, accounting for 14.7 and 12.9% of cells,  
135 respectively, while a population associated with somites accounts for 5.6% of cells (Figure 1C left  
136 panel). These findings are consistent with findings that somites are derived from multiple  
137 transcriptional trajectories including early paraxial mesoderm and neuromesodermal progenitors  
138 (Guibentif et al., 2021). In contrast, cKO D6 cells show increases in cells that retain epithelial  
139 characteristics and dramatically decreased percentages of neuromesodermal progenitors (2.3%),  
140 paraxial MD (7.5%), and somites (0.5%, Figure 1C, right panel). Comparing gene expression

141 between parental and cKO paraxial mesoderm clusters, cKO cells fail to appropriately induce  
142 lineage-appropriate genes such as *Pax3* and *Pax7*, and inappropriately upregulate lineage-  
143 inappropriate markers such as the epithelial-specific genes *Krt8* and *Krt18* (Figure 1D). These  
144 results show that Oct1 is necessary for accurate mesoderm differentiation and to suppress  
145 expression of genes for alternative lineages.

146 Pseudotime analysis of scRNA-seq data allows multiple differentiation timepoints to be  
147 overlaid with defined starting (ESC) and endpoint (somite) populations. Parental control cells  
148 progress through a largely linear pathway with one minor branch retaining an inappropriate  
149 epithelial fate (Figure 2A, top panel). In contrast, differentiating cKO ESCs show a larger  
150 proportion inappropriate branching into alternative developmental trajectories (bottom panel),  
151 consistent with the diminished developmental progression of paraxial MD to the somite stage,  
152 and consistent with enrichment of cells that inappropriately maintain an epithelial state (Figure 1C  
153 and Figure S1). We also examined pseudotemporal gene expression using specific genes  
154 associated with pluripotency and MD development. In this analysis, the position of each cell in  
155 pseudotime is shown on the X-axis and gene expression on the Y-axis (Figure 2B). Parental cells  
156 show robust early expression of genes associated with pluripotency such as *Klf4* that lose  
157 expression roughly mid-way through pseudotime. *Tbxt* is transiently induced, while the early  
158 somite markers *Pax7* and *Cxcr4* are efficiently and coordinately induced later (Figure 2B, top  
159 panel). In contrast, cKO cells exhibit inappropriately prolonged expression of *Klf4* and *Tbxt*, and  
160 largely fail to upregulate *Pax7* and *Cxcr4* (bottom panel). We used pseudotemporal ordering to  
161 visualize expression of the 2000 most variable (dynamic) genes in parental cells, and compared  
162 expression of the same genes in the same order in cKO cells (Figure 2C). This analysis revealed  
163 clusters associated with pluripotency (*Klf4*, *Nanog*), early MD differentiation (*T*), paraxial  
164 mesoderm (*Rspo3*, *Meox1*), and early somites (*Dll1*, *Pax3*). The pseudotime gene expression  
165 pattern for cKO cells revealed clusters with “fuzzy” patterns of gene expression early in  
166 differentiation, including prolonged expression of genes such as *Tbxt* and poor and blurred  
167 expression of genes in the clusters associated with paraxial mesoderm. In addition, the induction  
168 of somitic genes normally expressed later in development such as *Dll1*, *Pax3* and *Pax7* was poor  
169 in cKO cells (Figure 2C).

170 RNA velocity analysis allows developmental directionality to be inferred based on the ratio  
171 of unspliced, newly-synthesized pre-mRNA to mature spliced mRNA. A vector is then assigned  
172 to each cell that indicates developmental direction and magnitude relative to the other cells.  
173 Applying these algorithms, we found that D6 differentiated parental cells form discrete clusters

174 with dynamic developmental progression, e.g. paraxial MD and somite (Figure 2D, marked by  
175 long arrows). cKO cells by contrast are marked by stationary profiles indicative of failed  
176 differentiation potential, with cells progressing primarily towards a poorly differentiated state  
177 characterized by multiple lineage markers (Figure 2D). Cumulatively, the data demonstrate that  
178 Oct1 is required for efficient progression of differentiation program activation, with Oct1-deficient  
179 cells unable to canalize appropriate lineage specification programs.

180

### 181 **Oct1 Occupies Developmental Genes in ESCs**

182 One model that explains the above data is that Oct1 occupies developmental-specific targets  
183 bound by Oct4 in ESCs, to mediate induction of developmentally appropriate genes and  
184 repression of genes specific to alternative lineages. To test this hypothesis, we performed Oct1  
185 ChIP-seq. Prior work showed that Oct1 occupancy at Oct4 targets increases during retinoic acid  
186 (RA)-mediated differentiation when Oct4 expression is lost (Shen et al., 2017). RA ultimately  
187 differentiates cells into neuroectodermal lineages (Bain et al., 1995). In undifferentiated ESCs,  
188 strong Oct1 binding (with Oct4) was only observed in a group of ~100 genes containing Oct  
189 protein variant binding sites termed MOREs (Shen et al., 2017). We used a different Oct1 antibody  
190 with superior enrichment properties (see methods) to perform ChIP-seq with undifferentiated  
191 parental Oct1-sufficient ESCs, as well as cells differentiated towards MD for 3 and 6 days. Oct4  
192 ChIP-seq in undifferentiated ESCs was performed as a parallel control.

193 In pluripotent cells, ~22,000 Oct4 peaks were identified, corresponding to ~6,000 genes  
194 with transcription start sites (TSS) within 20 kb (Table S2). ~45% of Oct4 targets directly overlap  
195 Oct1 peaks. Conversely ~60% of Oct1 targets overlap Oct4 peaks (Figure 3A). The shared targets  
196 in ESCs are on average more strongly enriched for Oct4 than Oct1 as shown by tag density  
197 (Figure 3B), although the different antibodies could also contribute to the differential enrichment.  
198 Shared Oct1/Oct4 targets in ESCs include *Polr2a*, which encodes the largest subunit of RNA  
199 polymerase II, *Pou5f1*, which encodes Oct4, and *Dll1*, which encodes a developmentally-inducible  
200 mediator of Notch signaling expressed in the MD lineage where it regulates muscle development  
201 (Zhang et al., 2021). Tracks are shown in Figure S2A. We confirmed Oct1 and Oct4 binding to  
202 *Polr2a*, *Pou5f1* and *Dll1* using ChIP-qPCR (Figure S2). Oct1 binding to *Polr2a*, which contains  
203 two adjacent MOREs that can bind four Oct proteins (Kang et al., 2009a), is exceptional in that it  
204 is far stronger than Oct4 relative to other genes (100× stronger for *Polr2a*, 3-10× weaker for  
205 *Pou5f1* and *Dll*). Re-ChIP (sequential ChIP) indicates that Oct1 and Oct4 bind these sites  
206 simultaneously. The signal was specific to Oct1 because it was lost in Oct1 cKO ESCs (Figure

207 S2). Cumulatively, the data indicate that in ESCs Oct1 co-binds with Oct4 to an array of targets,  
208 including developmental-specific targets.

209 We performed ChIP-seq using D3 and D6 MD-differentiated cells. Only ~200 Oct4-bound  
210 peaks not occupied by Oct1 in pluripotent cells become occupied by Oct1 at D6 of MD  
211 differentiation (Figure 3A). Another ~800 peaks shared by Oct4 and Oct1 in pluripotent cells  
212 continue to be bound by Oct1 at D6. Analysis of these peaks using GREAT (McLean et al., 2010)  
213 identifies enrichment for oxidative stress, ribosomal and mitochondrial organization, Notch  
214 signaling and post-implantation development including somite formation (Figure S3A). Also,  
215 >6000 peaks become uniquely bound by Oct1 at MD D6 (Figure 3A). ~2300 peaks are uniquely  
216 bound at D3 (Figure S3B).

217 To pattern Oct1 and Oct4 occupancy during MD differentiation, we applied hierarchical  
218 clustering. Three major gene clusters were identified, three of which show static or decreased  
219 Oct1 binding over time (Figure 3C, clusters 1, 2, 4). Gene ontology (GO) analysis indicates  
220 involvement in signaling, mitochondrial function, stem cell differentiation and the regulation of  
221 Notch and TGF $\beta$  signaling. In contrast, Oct1 binding increases with differentiation in cluster 3.  
222 Genes near these peaks are associated with chromatin-modifying activities including  
223 acetyltransferase and polycomb group complexes. Oct1 and Oct4 enrichment at example cluster  
224 4 genes encoding polycomb complex members is shown in Figure 3D. These genes (*Ezh2*,  
225 *Suz12*, *Ring1* and *Ezh1*) show a gain in Oct1 occupancy as cells progress from pluripotency  
226 through D3 to D6 of MD differentiation. In the scRNA-seq UMAP projection, *Ezh2* expression is  
227 downregulated in cKO cells at D6, in particular in paraxial mesoderm (Figure 3E, F). The  
228 pseudotime induction of *Ezh2* expression observed in parental cells also fails in cKO (Figure 3G).  
229 These data indicate that during MD differentiation Oct1 directly binds to, and mediates the  
230 induction of, genes encoding epigenetic regulators.

231 We also queried Oct1 binding to genes associated with bivalency. To identify bivalent  
232 genes, we intersected ESC H3K27me3- and H3K4me3-enriched ChIP-seq peaks from the  
233 ENCODE database. This procedure identifies 3861 bivalent genes (Table S3). To query Oct1  
234 occupancy on these genes during differentiation, we intersected the bivalent gene dataset with  
235 Oct1 ChIP-seq in pluripotent and MD-differentiated parental cells, observing an increase in  
236 binding over time (Figure 3H, green and blue lines). A similar analysis at D6 using just MD-specific  
237 bivalent genes (generated by intersecting the bivalent gene dataset with MD development  
238 GO:0007498, Table S4) shows even stronger Oct1 enrichment (Figure 3H, purple line). These



239 findings indicate that Oct1 robustly binds to bivalent genes both in pluripotent cells and their  
240 differentiated progeny, with binding increasing at lineage-specific genes during differentiation.

241

### 242 **Oct1 is Necessary for Appropriate Bivalency Resolution**

243 To investigate perturbations in gene expression caused by Oct1 loss, we performed RNA-seq  
244 using parental and cKO ESCs, and cells differentiated towards MD for 3 or 6 days. Three  
245 replicates were performed per condition. ~1700, ~800 and 3,300 significantly differentially  
246 expressed genes were identified at D0, D3 and D6, respectively ( $FDR \leq 0.05$ ;  $-1 < \log_2FC < 1$ ,  
247 Table S5). Euclidean distance analysis reveals tight correlations between replicates and  
248 conditions at D0 and D3 (Figure 4A), but strong divergence at D6 relative to the other conditions  
249 and between parental and cKO D6 replicates (Figure 4A). Unsupervised hierarchical clustering  
250 reveals groups of genes regulated similarly between parental and cKO cells, and others with  
251 differential expression. One group, cluster 2, was marked by strong induction in differentiating  
252 cKO but failed induction in parental D6 cells. Example genes in this set include *Pax3*, *Pax7* and  
253 *Myog* (Figure 4B, box). GO analysis of the differentially expressed genes in cluster 2 reveals  
254 association with differentiation to neural tube (neuroectoderm) and somite (mesoderm, Figure  
255 4C). By contrast, clusters 1 and 4, which were associated with mis-expression of genes in  
256 differentiated cKO cells, were associated with terms such as primordial germ cells, immune  
257 system, vascular system and stromal cells (not shown). To identify potential regulators of these  
258 genes, we queried the ChIP Enrichment Analysis (ChEA) database (Lachmann et al., 2010).  
259 Genes with failed induction in differentiating cKO cells tend to be bound by the polycomb  
260 repressor complex 2 (PRC2) components Suz12 and Mtf2 (Figure 4C). Example tracks are shown  
261 in Figure 4D for *Pou5f1* (pluripotency), *Tbxt* (*T/Brachyury*, cluster 3) and *Pax7* (cluster 2). The  
262 retained D3 expression of *Pou5f1*, which encodes Oct4, provides a likely explanation for the tight  
263 correlations between gene expression states at D0 and D3, as these cells maintain pluripotency  
264 characteristics through D3. These data indicate that Oct1 loss results in defective induction of  
265 developmental genes that are also regulated by chromatin-modifying activities that act on  
266 H3K27me3.

267

### 268 **Oct1 directly regulates H3K27me3 via the recruitment of Utx**

269 Bivalency is positively resolved via the removal of repressive H3K27me3 marks to activate  
270 lineage-appropriate genes, or negatively resolved via the removal of activating H3K4me3 marks  
271 to stably repress lineage-inappropriate genes (Bernstein et al., 2006; Dhar et al., 2016). Our

272 findings indicate that genes with failed induction in differentiating cKO cells tend to be bound by  
273 chromatin-modifying complexes that act on H3K27me3. We hypothesized that Oct1 locally  
274 recruits H3K27-specific demethylases to lineage-specific bivalent genes to mediate their induction  
275 during differentiation. One such demethylase is Utx/Kdm6a (Cloos et al., 2008), which has been  
276 shown to regulate neuronal differentiation. To test the association between Oct1 binding,  
277 H3K27me3 and Utx, we also performed ChIP-seq using specific antibodies at D6 of differentiation  
278 of parental, Oct1 sufficient cells. ~12,000 H3K27me3 peaks and ~12,000 Utx peaks were  
279 identified, corresponding to ~11,000 genes within 20 kb (Table S2). Unsupervised hierarchical  
280 clustering together with Oct1 peaks from the same cells identifies shared and distinct peaks,  
281 including weak Oct1 binding events with strong Utx and H3K27me3 association (cluster 3), and  
282 strong Oct1 binding events associated with weaker Utx and lack of H3K27me3 (cluster 4, Figure  
283 5A). This latter cluster includes genes induced in MD such as *Pax3*, *Pax7* and *Myog*. We interpret  
284 cluster 3 to be poised bivalent genes and cluster 4 to be positively resolved genes. GO terms  
285 associated with these clusters were enriched for development and musculoskeletal abnormalities  
286 (Figure 5B). Intersecting the Utx and Oct1 ChIP-seq peaks identifies a high degree of overlap,  
287 with ~70% of Oct1-bound peaks also associating with Utx (Figure 5C).

288 To test if cKO cells inappropriately retain H3K27me3 at lineage-appropriate genes during  
289 MD differentiation, we performed ChIP-qPCR using primers flanking a strong Oct1 peak on the  
290 *Pax3* promoter. *Pax3* is induced by D6 of MD differentiation (Figure 2C), and reduced in Oct1  
291 cKO cells at this timepoint (Figure 2C and Figure 1D). As expected, H3K27me3 is robust and  
292 equivalent in D0 undifferentiated cells, while D6 parental cells show reduced H3K27me3. In  
293 contrast, cKO cells inappropriately retain elevated H3K27me3 (Figure 5D). Consequently, ~3-fold  
294 higher H3K27me3 enrichment is observed in differentiated cKO relative to parental cells. Global  
295 H3K27me3 levels are unchanged at the same timepoint, as evidenced by immunofluorescence  
296 (Figure 5E). Next, we performed Utx ChIP-qPCR with the same primers. Utx is enriched at the  
297 *Pax3* promoter at D6 of MD differentiation, validating the ChIP-seq enrichment in parental cells.  
298 Further, Utx showed reduced enrichment in cKO cells (Figure 5F). To demonstrate that Oct1 and  
299 Utx were simultaneously bound, we performed re-ChIP experiments, observing enrichment at  
300 *Pax3* and another region, an enhancer region near *Dll1*, but not at the 28S control region (Figure  
301 5G). These results indicate simultaneous association of Utx and Oct1 at *Pax3*, and specific  
302 defects in removing H3K27me3 from *Pax3* in differentiating Oct1-deficient cells.

303 We then determined if Oct1-Utx interact by co-immunoprecipitation using extracts from  
304 undifferentiated parental ESCs, as well as cells at D6 of MD differentiation. The Oct1-Utx

305 interaction is established in ESCs and maintained during differentiation (Figure 5H). Utx  
306 recruitment by Oct1 potentially explains the failure of bivalent, lineage-specific genes such as  
307 *Pax3* to positively resolve bivalency in cKO cells (Figure 5D). Oct1, Oct4 and Utx binding to *Pax3*  
308 is shown in Figure 5I.

309

### 310 **Smad proteins cooperate with Oct1 in cells differentiating towards MD**

311 The broad expression of Oct1 raised the question of how Oct1 recruits Utx specifically at lineage-  
312 specific genes to mediate gene activation. Chromatin accessibility, lineage-specific signaling and  
313 co-bound transcription regulators may provide this specificity. We performed motif analysis (Heinz  
314 et al., 2010) using DNA sequences  $\pm 100$  bp from the center of the 807 peaks co-bound by Oct1  
315 and Oct4 in pluripotent cells that remain Oct1-bound during MD differentiation (Figure 3A). This  
316 procedure identifies not only Oct1 sites, but also binding sites for Smads, the terminal transcription  
317 regulators of TGF $\beta$ /Nodal signaling (Figure 6A). TGF $\beta$  signals and downstream Smad  
318 transcription factor activity are critical for MD induction (Conlon et al., 1994; Zhou et al., 1993). A  
319 study identified Oct1 transcription factor motifs near binding events for zebrafish Smad2/3 (Liu et  
320 al., 2011). This study further showed that ectopic expression of the zebrafish Oct1 ortholog  
321 enhances mesoderm induction, that zebrafish Smad2 and Oct1 physically interact, and that the  
322 two factors cooperate to enhance transcription. Mammalian Smad3 also interacts with Oct4 and  
323 co-occupies target genes in pluripotent cells (Mullen et al., 2011). Consistent with these findings,  
324 Oct1 immunoprecipitation in D6 MD-differentiated cells efficiently detects co-precipitated Smad3  
325 (Figure 6B). *Smad3* is expressed in undifferentiated populations, but further induced by MD  
326 differentiation (Figure 6C).

327 To test if Oct1 and Smad proteins such as Smad3 synergize to regulate gene expression,  
328 we cloned an 85 bp region  $\sim 3$  kb upstream of the *Myog* gene together with the CMV core promoter  
329 upstream of a luciferase reporter vector (Figure 6D). This region contains two octamer sites and  
330 two Smad sites, and overlaps with an ENCODE distal enhancer signature (Abascal et al., 2020).  
331 The region is also located within a known super-enhancer associated with myotubes (Hnisz et al.,  
332 2013). The sequences were inserted into a reporter vector that expresses secreted  
333 nanoLuciferase, and co-transfected with a plasmid constitutively expressing secreted mCherry  
334 (Wider and Picard, 2017) as an internal standard (Figure 6D). Cells were either co-transfected  
335 with a construct encoding mouse Oct1, treated with recombinant TGF $\beta$ 1, or both. The two  
336 treatments together generate cooperative luciferase activity (Figure 6E). No such activity was

337 observed using constructs with mutant Oct/Smad binding sites. These results indicate that Oct  
338 and Smad sites at the *Myog* enhancer cooperate to drive gene expression.

339

### 340 **Loss of Oct1 results in abnormal terminal MD differentiation**

341 To study the consequences of Oct1 deficiency for MD development, we differentiated parental  
342 and cKO cells for 19 days, and queried expression of the myogenic genes *Myod* and *Myog* by  
343 RT-qPCR. Relative to *Rps2* (which encodes a ribosomal 40S subunit), both genes are strongly  
344 expressed in parental but not cKO cells (Figure 7A). Consistently, after D11 of differentiation,  
345 immunostaining for embryonic myosin heavy chain (MyH-emb) reveals robust expression in fused  
346 myotubes in parental cells, with cKO expression close to background (Figure 7B). These results  
347 demonstrate that cKO ESCs differentiate into muscle poorly, consistent with their defective early  
348 gene expression programs and developmental trajectories.

349 Metabolic changes during development are necessary to complete the MD differentiation  
350 program (Cliff et al., 2017; Oginuma et al., 2017). Among these changes are the induction of high  
351 glycolytic flux during formation of paraxial MD, which is required for posterior elongation of  
352 embryonic axis (Oginuma et al., 2017). To determine changes in steady-state metabolites in  
353 parental and cKO ESCs at day 0 and 6 of MD differentiation, we performed GC-MS. Principle  
354 component analysis of the metabolites showed few differences in metabolite levels (Figure S4A).  
355 Differentiation of parental cells significantly changes metabolite composition, in particular in the  
356 PC1 axis (Figure S4A). Metabolites markedly changed by differentiation include the amino acids  
357 leucine and threonine (up), and TCA intermediates such as malate and fumarate (down, Figure  
358 S4B). Compared to parental cells, cKO cells show a significant downregulation ( $P<0.007$ ) of both  
359 D-glucose and pyruvate, and an increase ( $P<0.01$ ) in TCA intermediates such as citrate,  
360 isocitrate, malate and succinate (Figure S5C). These results suggest that cKO cells induce  
361 glycolysis poorly during MD differentiation.

362

### 363 **Ectopic Oct1 expression improves mesodermal specification and differentiation**

364 To complement Oct1 deficiency and determine the effect of ectopic Oct1 expression in Oct1-  
365 deficient cells, we transduced parental and cKO ESCs with retroviral vectors encoding murine  
366 Oct1 or empty vector (EV) controls. The vectors encode a puromycin resistance cassette, allowing  
367 for selection of transduced cells. Immediately after selection, populations of transduced cells were  
368 subjected to MD differentiation for 11 d, and probed for *Myod*, *Myog* and *Pax3* by RT-qPCR.  
369 Strikingly, differentiating Oct1-transduced ESCs more strongly express both *Myod* and *Myog*, and

370 decreased *Pax3* (Figure 7C). The combination of elevated *Myod* and *Myog* with decreased *Pax3*  
371 expression at late differentiation timepoints suggests that ectopic, retrovirally expressed Oct1 not  
372 subject to endogenous regulation enables cells to more efficiently transit through a *Pax3*-  
373 expressing intermediate state, such that more cells enter into a terminal myogenic program.  
374 Immunoblotting confirmed ectopic Oct1 expression and complementation of Oct1 deficiency  
375 (Figure 7D).

## 376 DISCUSSION

377

378 During development, chromatin transitions from a pluripotent state permissive for different  
379 lineages to a lineage-restricted state. Pluripotent cells maintain genes encoding developmental-  
380 specific mediators in a poised “bivalent” configuration that allows for later induction or stable  
381 repression, depending on the developmental lineage (Bernstein et al., 2006). Here we show that  
382 during mesodermal differentiation, the Oct4 paralog Oct1 binds and mediates the induction of  
383 developmental lineage-specific bivalent genes by recruiting the Utx histone demethylase to  
384 remove repressive H3K27me3 marks. Consequently, Oct1-deficient ESCs manifest defective MD  
385 differentiation, including failure to express *Myod* and *Myog* mRNA, and myosin heavy chain  
386 protein. Oct1-deficient animals manifest defective induction of somites, cardiac tissue and blood  
387 cells (Sebastiano et al., 2010; Wang et al., 2004).

388 The central role of Oct1 in “canalizing” differentiating pluripotent cells in early steps of  
389 mesodermal specification was shown using single-cell RNA-seq with Oct1 cKO ESCs. In the  
390 absence of Oct1, cells undergoing differentiation retain pluripotency characteristics such as an  
391 epithelial state, and achieve somite-stage gene expression patterns poorly and in reduced  
392 numbers. The cells mis-express developmentally inappropriate genes and undergo inappropriate  
393 developmental branching towards poorly differentiated states marked by epithelial gene  
394 expression and oxidative stress. The induction of genes important early in MD differentiation such  
395 as *Tbxt* becomes weaker and loses temporal coherence. Later, there is failed induction of genes  
396 such as *Pax7* and *Cxcr4*.

397 In differentiating cells, Oct1 occupies a subset of genes bound by Oct4 in pluripotent cells.  
398 These include MD-specific bivalent developmental mediators and genes encoding chromatin-  
399 modifying enzymes. Lineage-specific bivalent, developmentally poised genes are poorly induced  
400 in cKO cells. Oct1 occupancy on these genes normally increases with differentiation, suggesting  
401 a critical role in canalization of cell fate. We find that Oct1 recruits Utx to lineage-specific, Oct1-  
402 bound targets such as *Pax3*. The lack of Utx recruitment to lineage-specific genes in cKO cells is  
403 consistent with the abnormal retention of H3K27me3 at the promoters of these genes and their  
404 failed transcriptional upregulation. An “anti-repression” mechanism for Oct1 involving the removal  
405 of repressive chromatin marks has been described for Oct1 before, for H3K9me2 (Shakya et al.,  
406 2011). This is the first description of a role for Oct1 and H3K27me3. One mechanism that allows  
407 Oct1 to use Utx as a cofactor specifically at MD-appropriate targets is collaboration with Smad3.  
408 Smad transcription factor binding sites are enriched near sites of Oct1 binding during MD

409 differentiation. TGF $\beta$  signals drive Smad transcription factor binding and are critical for MD  
410 specification (Liu et al., 2011; Mullen et al., 2011). Co-IP experiments in D6 MD-differentiated  
411 cells show an interaction between Oct1 and Smad3, consistent with prior findings in zebrafish (Liu  
412 et al., 2011). A model for Oct1's function at lineage-specific genes during MD specification and  
413 later differentiation is shown in Figure 7E. In this model, Oct1 and Smad form cooperative  
414 complexes at MD-specific genes, and Utx recruitment to Oct1 allows for loss of the repressive  
415 H3K27me3 mark and successful resolution of bivalency. Subsequently, other transcription factors  
416 (e.g., MyoD) act as primary "on" switches to induce gene expression. Oct1 also binds and induces  
417 the expression of genes encoding PRC complex members such as *Ezh2* in MD-specific clusters  
418 in parental but not cKO cells. The increased expression of PRC components may solidify lineage  
419 specification by aiding the repression of the large number of genes specific to alternative lineages  
420 (Collinson et al., 2016).

421 We show that ectopic Oct1 expression can improve canalization and lineage-specific gene  
422 expression. Under MD differentiation conditions, exogenous Oct1 increases expression of the  
423 terminal differentiation markers *Myod* and *Myog*, while decreasing the early lineage-specification  
424 marker *Pax3*, which is transiently expressed during MD differentiation and is necessary for later  
425 expression of myogenic genes. Because *Pax3* is no longer expressed in terminally differentiating  
426 cells, these results suggest that ectopic Oct1 enables transit through a *Pax3*-expressing  
427 intermediate to potentiate productive terminal differentiation. More investigation into this pathway  
428 may uncover methods to more efficiently differentiate pluripotent cells. Understanding how to  
429 improve canalization of differentiating cells could lead to improvements in therapeutic approaches  
430 for regenerative medicine.

431 **FIGURE LEGENDS**

432

433 **Figure 1. Differentiating Oct1-deficient ESCs canalize poorly into mesodermal lineages**

434 (A) UMAP projection of scRNA-seq data from superimposed parental (Oct1 sufficient)  
435 undifferentiated ESCs, and parental cells early during MD differentiation (days 3 and 6). Clusters  
436 of cells were labeled based the expression of developmental markers as in (B). Three combined  
437 replicate plates were used for the analysis.

438 (B) Violin plots showing gene expression levels of key developmental markers by cluster. Data  
439 were log-normalized for each cell using the natural logarithm, scaled and averaged using  
440  $\text{mean}(\text{expm1}(x))$ .

441 (C) Comparative UMAP projections of integrated D6 parental and Oct1-deficient (cKO) scRNA-  
442 seq populations. Clusters were labeled computationally and identified based on gene expression.  
443 Relative frequencies are shown.

444 (D) Differential gene expression analysis of the neuromesodermal cluster shown as a scatter plot.  
445 Red dots depict significantly differentially expressed genes based on FDR corrected  $p < 0.05$  and  
446 fold change  $> 1.2$ . Example differentially expressed genes are labeled.

447

448 **Figure 2. Oct1-deficient cells show perturbed developmental trajectories**

449 (A) Pseudotime analysis of pluripotent and differentiating parental (top panel) and cKO (bottom  
450 panel) cells. Colors correspond to the time point at which cells were collected (red: D0, green:  
451 D3, blue: D6).

452 (B) *Klf4*, *Tbxt*, *Pax7* and *Cxrc4* mRNA expression across pseudotime in parental (top panels) and  
453 cKO (bottom panels). Black trendline represents an average expression for a given gene across  
454 all populations.

455 (C) Heatmap depicting expression of the 2000 most dynamically expressed genes (based on  
456 FindVariableFeatures function, Seurat) in parental D6 cells. Gene expression was plotted as a  
457 heat map across pseudotime in parental (left panel) and cKO (right panel). Dynamic genes were  
458 first hierarchically clustered in parental cells to cluster groups of genes that behave similarly in  
459 pseudotime, then plotted in the same order in cKO cells.

460 (D) Velocity gene expression analysis of parental (left panel) and cKO (right panel) cells at  
461 differentiation day 6. Arrows point toward cells with gene expression closest to the future state of  
462 each cell based on unspliced/spliced transcripts. Arrow length represents magnitude.

463



464 **Figure 3. Oct1 co-occupies target sites with Oct4 in ESCs, and regulates their expression**  
465 **during differentiation**

466 (A) Venn diagram showing common and unique Oct4 and Oct1 binding sites based on ChIP-seq  
467 in parental ESCs and at D3 and D6 of mesodermal differentiation.

468 (B) Tag density around peak centers for total Oct4 (red) and Oct1 (blue) ChIP-seq data sets.

469 (C) A matrix of Oct4 and Oct1 ChIP-seq enrichment 2 kb around peak centers was computed for  
470 the merged peak list and shown as heatmap. Positions in color show high enrichment and white  
471 shows no enrichment.

472 (D) Tracks of representative loci associated with regulation of H3K27me3. Y-axes were scaled to  
473 the same value for each gene.

474 (E) *Ezh2* expression is shown in UMAP projections for parental and cKO cells at D6 of MD  
475 differentiation. The paraxial MD cluster is outlined in red.

476 (F) Violin plots showing *Ezh2* expression in cells within the paraxial MD cluster shown in (E).

477 (G) *Ezh2* expression in pseudotime in parental (top panel) and cKO (bottom panel) cells. Black  
478 trendline represents average expression across all the cells in pseudotime.

479 (H) Oct1 enrichment based on tag density at peak center at annotated bivalent genes in ESCs  
480 (red), and at MD differentiation D3 and D6 (green and blue). An additional analysis was performed  
481 for MD-specific bivalent genes at MD differentiation D6 (purple).

482

483 **Figure 4. Failed bivalent gene induction in differentiating Oct1 cKO ESCs**

484 (A) Clustering of the RNAseq replicates using Euclidean distance method shows divergence  
485 between replicates and conditions. D6 shows the most variance compared to the other times and  
486 comparing parental (WT) and cKO (KO).

487 (B) Bulk RNA-seq Heatmap of differentially expressed genes (parental vs. cKO) at D0, D3 and  
488 D6 of MD differentiation is shown. Cluster 2 shows poor gene induction in the Oct1-deficient  
489 condition. Representative genes in this cluster are shown at right.

490 (C) Jensen Tissue and ChIP-X Enrichment Analysis (ChEA) query results for Cluster 2 in (B) are  
491 shown.

492 (D) Example RNA-seq genome tracks (*Pou5f1*, *Tbxt*, *Pax7*) are shown. *Pax7* is an example  
493 cluster 2 gene. Y-axes were group-autoscaled for each gene.

494

495 **Figure 5. Oct1 interacts with Utx to demethylate H3K27me3 at bivalent genes.**

496 (A) A matrix of Oct1, H3K27me3 and Utx ChIP-seq enrichment 2 kb around peak centers was  
497 computed for the merged peak list and shown as heatmap. Positions in color show high  
498 enrichment and positions in white show no enrichment.  
499 (B) Human Phenotype Ontology terms for Cluster 3 and 4 genes from (A) are shown.  
500 (C) The Oct1 and Utx peak lists were intersected (overlap  $\geq 1$  bp) and plotted as a Venn diagram.  
501 69% of Oct1 peaks overlapped with Utx binding events.  
502 (D) H3K27me3 ChIP-qPCR enrichment at the *Pax3* promoter in parental and cKO cells at MD  
503 differentiation D0 (ESC) and D6. Normalized fold-enrichment is shown relative to both an isotype  
504 control antibody and to a nonspecific genomic region encoding the 28S ribosomal subunit. Data  
505 represent an average of 3 independent biological replicates. Error bars depict  $\pm$ SEM.  
506 (E) H3K27me3 immunofluorescence images from D6 MD-differentiated parental and cKO  
507 cultures. Images were collected a 40 $\times$  magnification.  
508 (F) Utx enrichment at the *Pax3* promoter in parental and cKO cells on differentiation D6. Fold-  
509 enrichment relative to an isotype control antibody and relative to a 28S ribosomal subunit region  
510 is shown. Data represent an average of 3 independent biological replicates. Error bars depict  
511  $\pm$ SEM.  
512 (G) Sequential ChIP (re-ChIP)-qPCR Oct1/Utx simultaneous enrichment at the *Pax3* promoter  
513 and *Dll1* enhancer is shown for both parental and Oct1 cKO cells at D6 of MD differentiation. Fold  
514 enrichment relative to an isotype control antibody is shown. 28S is shown as a control. Data  
515 represent an average of 3 independent biological replicates. Error bars depict  $\pm$ SEM.  
516 (H) Immunoprecipitation of Utx followed by Oct1 immunoblot using parental ESCs, or ESCs MD-  
517 differentiated for 6D.  
518 (I) Signal tracks (*Mm10* v.D191020) showing Oct4, Oct1 and Utx enrichment at the *Pax3* locus 5'  
519 region. Y-axes were group-autoscaled for each gene. Positions of identified HOMER Smad2/3/4  
520 motifs are shown below.

521

522 **Figure 6. Oct1 and Smad3 cooperate to drive expression of mesoderm-specific bivalent**  
523 **genes**

524 (A) HOMER motif analysis of Oct1 peaks that are both shared with Oct4 in ESCs, and maintained  
525 after D6 of MD differentiation.  
526 (B) Smad3 immunoblot using cell lysates immunoprecipitated with Oct1 antibodies, or rabbit IgG  
527 controls. D6 MD-differentiated cells were used. 20% input is shown (lane 1).

528 (C) *Smad3* gene expression is shown in violin plots for parental ESCs at D6 of MD differentiation.  
529 (D) Schema for Oct1/Smad reporter assay. A segment of a mouse *Myog* enhancer element  
530 containing multiple octamer and Smad motifs was cloned with the core CMV promoter upstream  
531 of secreted nLuc and co-transfected into Oct1-deficient MEFs together with a construct encoding  
532 constitutive secreted mCherry as a normalization control. Added TGFb1 and co-transfected  
533 mouse Oct1 supply Oct1 and Smad3 activity.  
534 (E) Transfected WT (left panel) or Oct/Smad mutant (right panel) *Myog* enhancer constructs were  
535 supplied with Oct1, recombinant purified TGFb1 treatment, or both. For each construct, secreted  
536 luciferase activity was assessed relative to secreted mCherry expressed from a co-transfected  
537 plasmid. An average of three experimental replicates is shown. Error bars denote  $\pm$ SEM. For the  
538 situation in which both Oct1 and TGFb1 are both supplied, fold changes relative to a double-  
539 mutant construct are also shown.  
540 (F) Signal tracks (*Mm10* v. D191020) showing Oct1ChIP-seq enrichment at the *Myog* locus.  
541 Shown above are RNA-seq tracks in differentiated and undifferentiated parental and cKO cells.  
542 Annotated enhancer elements are shown below.

543

544 **Figure 7. Myogenic lineage induction is defective in the absence of Oct1 and augmented**  
545 **with Oct1 ectopic expression**

546 (A) Relative mRNA expression levels of the myogenic genes *Myod1* and *Myog* in parental and  
547 cKO ESCs differentiated for 19D. Data represent an average of 3 independent biological  
548 replicates. Error bars depict  $\pm$ SEM.  
549 (B) Embryonic myosin heavy chain (MyHC-emb) expression alone and merged with DAPI is  
550 shown using parental (top panel) or cKO (bottom panel) cells at MD differentiation day 11.  
551 (C) RT-qPCR for the myogenic genes *Myod1*, *Myog* and *Pax3* in parental and cKO cells  
552 transduced with retroviruses encoding Oct1, or empty vector controls. Transduced cells were  
553 selected using puromycin for 48 hr prior to differentiation for 11D. Empty vector values were set  
554 to 1 for both parental and cKO cells. Data represent an average of 3 independent biological  
555 replicates. Error bars depict  $\pm$ SEM.  
556 (D) Immunoblot showing ectopic Oct1 expression in parental and cKO cells.  $\beta$ -actin is shown as  
557 a loading standard.  
558 (E) Sequential model of bivalency resolution for lineage-appropriate (MD-specific) genes.  
559 Pluripotent cells co-express Oct1 and Oct4, which co-bind to poised targets. Upon loss of

560 pluripotency and Oct4, Oct1 continues to occupy these genes. TGF $\beta$  signals allow for binding of  
561 Oct1 and Smad proteins to MD-specific targets, recruitment of Utx and demethylation of  
562 H3K27me3. Later, other transcription factors serve as primary “on” switches for muscle-specific  
563 gene expression.

564

## 565 **SUPPLEMENTAL FIGURE LEGENDS**

566

### 567 **Figure S1. Expression of selected genes in UMAP clusters of pluripotent cells and cells at** 568 **MD differentiation D3 and D6.**

569 Expression of eight different genes that highlight specific clusters is shown. Right: clusters are  
570 highlighted in undifferentiated, MD D3- and MD D6-differentiated cells similar to Figure 1A.

571

### 572 **Figure S2. Oct1 and Oct4 binding and co-binding in ESC cells (D0 of differentiation).**

573 (A) ChIP-seq signal tracks for *Polr2a* promoter are shown at left. Plot in center shows Oct1 and  
574 Oct4 ChIP-qPCR fold enrichment relative to a nonspecific 40S rRNA genomic region. At far right  
575 is Oct1 $\rightarrow$ Oct4 sequential ChIP-qPCR (re-ChIP). qPCR data were normalized to a 40S rRNA  
576 nonspecific genomic region. An average of three biological replicates are shown. Error bars depict  
577  $\pm$ SEM. \* *p*-value <0.05, \*\* *p*-value <0.01, \*\*\* *p*-value <0.001.

578 (B) Similar data for the *Pou5f1* enhancer.

579 (C) Similar data for the *Dll1* enhancer.

580

### 581 **Figure S3. Oct1 binding shifts from predominantly distal peaks in ESCs to promoter peaks** 582 **in MD D6 differentiated cells.**

583 (A) Top enriched GO terms in MD D6 Oct1-bound peaks maintained during differentiation (shared  
584 with Oct1- and Oct4-bound peaks in ESCs, 807 peaks).

585 (B) Venn diagram similar to Figure 3A except showing common and unique binding peaks in MD  
586 D3-differentiated cells.

587

### 588 **Figure S4. Metabolic profiling of parental and cKO ESCs and MD-differentiated cells.**

589 (A) PCA plot of parental and cKO metabolic profiles.

590 (B) Heatmap of metabolites that change with MD differentiation of parental cells.

591 (C) Heatmap showing differential metabolites between parental and cKO cells at MD D6. 6  
592 biological replicates were used for each condition.

593 **STAR METHODS**

594 RESOURCE AVAILABILITY

595 Data and Code Availability

596 The datasets generated during this study are available through the GEO website [GSE160941].

597 The code supporting the current study are available from the first author on request.

598

599 METHOD DETAILS

600 **Cell culture**

601 ESCs were cultured as previously described (Shakya et al., 2015a) with 2i conditions: ERK  
602 inhibitor PD0325901 (1  $\mu$ M, LC Laboratories) and GSK3 inhibitor CHIR99021 (3  $\mu$ M, LC  
603 Laboratories). Cultures were maintained on irradiated feeders (ThermoFisher). Prior to all  
604 experiments ESCs were plated on gelatin to deplete the feeders. For MD differentiation, ESCs  
605 were plated on gelatin and cultured as previously described (Chal et al., 2015). Briefly, parental  
606 and cKO cells were cultured in N2B27 medium supplemented with recombinant Bmp4  
607 (Peprotech) for 2 d. After 48 hr, media was changed to RDL (Rspo3, DMSO, LDN) medium. Cells  
608 were harvested 24 hr (day 3) or 96 hr (day 6) later. For muscle differentiation, cells were switched  
609 to HIFL (Hgf, Igf, Fgf, Ldn) medium and cultured for 48 hr (day 8) after which medium was  
610 switched to 2% horse serum (ThermoFisher). Cells were harvested on day 11 (overexpression  
611 experiments) or 19 (RT-qPCR).

612

613 **Single cell RNA-seq**

614 Single cell transcriptomes were analyzed as described previously (Dell'Orso et al., 2019). The  
615 10X Genomics Chromium Single Cell Gene Expression Solution with 3' chemistry, version 3 (PN-  
616 1000075) was used to tag individual cells with 16 bp barcodes and specific transcripts with 10 bp  
617 Unique Molecular Identifiers (UMIs) according to manufacturer instructions. Briefly, single-cell  
618 suspensions were isolated using trypsinization and resuspension in PBS with 0.04% BSA  
619 (ThermoFisher). Suspensions were filtered through 40  $\mu$ m cell strainers. Viability and cell count  
620 were assessed using a Countess I (ThermoFisher). Equilibrium to targeted cell recovery of 6,000  
621 cells along with Gel Beads and reverse transcription reagents were loaded to Chromium Single  
622 Cell A to form Gel-bead-in Emulsions (GEMs). Within individual GEMs, cDNA generated from  
623 captured and barcoded mRNA was synthesized by reverse transcription at 53°C for 45 min.  
624 Samples were then heated to 85°C for 5 min. Subsequent A tailing, end repair, adaptor ligation  
625 and sample indexing were performed in bulk according to manufacturer instructions. The resulting

626 barcoding libraries were qualified on Agilent Technology 2200 TapeStation system and subjected  
627 to qPCR using a KAPA Biosystems Library Quantification Kit for Illumina Platforms (KK4842). The  
628 multiple libraries were then normalized and sequenced on an Illumina NovaSeq 6000 using the  
629 2×150 PE mode.

630

### 631 **Data Processing and clustering**

632 Sequences from the Chromium platform were de-multiplexed and aligned using CellRanger ver.  
633 3.1.0 (10X Genomics) with default parameters mm10-3.0.0. Clustering, filtering, variable gene  
634 selection and dimensionality reduction were performed using Seurat ver.3.1.5 (Stuart et al., 2019)  
635 according to the following workflow: 1, Cells with <300 detected genes and >10000 genes were  
636 excluded further analysis. 2, Cells with <12% UMIs mapping to mitochondrial genes were retained  
637 for downstream analysis. 3, The UMI counts per ten thousand were log-normalized for each cell  
638 using the natural logarithm. 4, Variable genes (2000 features) were selected using the  
639 FindVariableFeatures function. 5, Common anchors between the three parental timepoints  
640 (Fig.1A) or parental and cKO D6 (Fig.1C) were identified using FindIntegrationAnchors function  
641 that were further used to integrate these sets. 6, Gene expression levels in the integrated set  
642 were scaled along each gene and linear dimensional reduction was performed. The number of  
643 principal components was decided through the assessment of statistical plots (JackStrawPlot and  
644 ElbowPlot). 7, Cells were clustered using a by a shared nearest neighbor (SNN) modularity  
645 optimization-based clustering algorithm and visualized using two-dimensional uniform manifold  
646 approximation and projection (UMAP). 8, Cluster identities were defined based on the distribution  
647 of the specific markers. Differentiation gene expression analysis between the parental and cKO  
648 clusters was performed using FindMarkers. Genes with adjusted  $p < 0.01$  were marked red on  
649 scatter plots.

650

### 651 **Pseudotime and Velocity analysis**

652 Trajectory analysis of scRNA-seq was performed using Monocle v.2.16.0 (Trapnell et al., 2014).  
653 Parental and cKO sets were filtered using the same parameters as above and merged to generate  
654 WT and cKO sets. Cells were ordered based on gene lists for the ESC (beginning) and somite  
655 (end) clusters in parental UMAP (Fig.1A). Next, we performed dimensional reduction using the  
656 DDRTree method to visualize the dataset, ordered the cells by global gene expression levels, and  
657 visualized the trajectory of the dataset. Velocity analysis was performed using the velocity  
658 package (La Manno et al., 2018). Loom files were produced using following parameters: velocity

659 run10x -m mm10. rnsk.gtf genes.gtf. Gtf files were produced from the Cell Ranger pipeline.  
660 Velocity embeddings were produced using the velocity.r and SeuratWrappers packages.  
661 Matrices were filtered using following parameters: nFeature\_spliced > 300, nFeature\_spliced <  
662 10000, nFeature\_unspliced > 200, nFeature\_unspliced < 6000, percent.mt < 12. Velocity was  
663 calculated using RunVelocity using following parameters: deltaT = 1, kCells = 25, fit.quantile =  
664 0.02. Velocity embedding were projected on T-SNE maps using the  
665 show.velocity.on.embedding.cor function.

666

### 667 **RT-qPCR**

668 RNA was isolated using TRIzol (ThermoFisher). cDNA was synthesized using a SuperScript Vilo  
669 cDNA Synthesis Kit (ThermoFisher). RT-qPCR oligonucleotide primers are listed in Table S6 and  
670 were confirmed to generate a single product of the correct size. To ensure specific PCR  
671 amplification, every RT-qPCR run was followed by a dissociation phase analysis (denaturation  
672 curve) to confirm the presence of single amplified peaks.

673

### 674 **ChIP**

675 ChIP-qPCR and ChIP-seq were performed as previously described (Perovanovic et al., 2016).  
676 Briefly, WT and cKO cells were crosslinked with 1% formaldehyde for 10 min and quenched for 5  
677 min using 2.5M glycine. Culture plates were washed using ice cold PBS and cells were harvested  
678 by cell scaping. Cells were lysed in Farnham buffer (5 mM Pipes pH 8.0, 85 mM KCl, 0.5% NP-  
679 40) and subsequently in RIPA buffer (phosphate-buffered saline, 1% NP-40, 0.5% sodium  
680 deoxycholate, 0.1% SDS). Chromatin was sheared using a Covaris sonicator for 5 min (30 sec  
681 on/30 sec off) with amplitude=40. Correct chromatin fragmentation was confirmed using 1%  
682 agarose gels. 50 µg of chromatin was subjected to IP overnight at 4°C with 4 µg of anti-Oct1  
683 (Novus Biological), Oct4 (Santa Cruz) or H3K27me3 (Milipore) antibodies. As a control, we used  
684 5 µg of sheared, non-precipitated input chromatin. Samples were incubated with protein G  
685 magnetic beads (ThermoFisher) for 5 hr and washed in Low Salt buffer (20 mM Tris-Cl pH 8.0,  
686 150 mM NaCl, 2 mM EDTA, 0.1% SDS, 1% Triton X-100), High Salt buffer (identical but with 500  
687 mM NaCl), LiCl buffer, and Tris-EDTA pH 8.0 plus 1 mM EDTA (TE buffer). Washes were  
688 performed at 4°C for 10 min with rotation. For re-ChIP, 2% fragmented chromatin was saved as  
689 input and the rest used for IP with Oct4 antibody at 4°C overnight on a rotator. Samples were then  
690 incubated with magnetic beads for 5h at 4°C. The beads were washed for 10 min with Low Salt  
691 buffer, High Salt buffer, Low Salt buffer, LiCl buffer, and TE buffer sequentially at 4°C. Chromatin

692 was eluted with 300  $\mu$ L IP Elution buffer at RT, then diluted 10-fold in RIPA buffer. Diluted samples  
693 were then subjected to a second IP with 4  $\mu$ g of Oct1 antibody (Novus Biological) at 4°C overnight,  
694 and incubated with magnetic beads for 5 hr at 4°C. The beads were washed again as described  
695 above, then eluted with 300  $\mu$ L IP Elution Buffer at RT. Re-ChIP samples, together with the 2%  
696 input, were incubated at 65°C overnight to reverse crosslinking. DNA was purified using phenol-  
697 chloroform-isoamyl alcohol extraction followed by PCR clean up. qPCR primers can be found in  
698 Table S6 and were confirmed to generate a single product of the correct size. The results were  
699 reported as qPCR values normalized to input chromatin (gDNA) and non-specific region and  
700 presented as fold enrichment.

701

### 702 **ChIP-seq analysis**

703 After chromatin was precipitated as described above, and libraries were sequenced using Illumina  
704 NovaSeq. Between 22 and 26 million paired-end Illumina sequencing reads were aligned to the  
705 mouse *Mm10* reference genome using Novocraft novoalign v3.8.2, allowing for one random  
706 alignment of multi-mapping reads, and providing the adapter sequences for automatic trimming  
707 concordant with alignment. ChIP was analyzed using the MultiRepMacChIPSeq pipeline v12.2,  
708 using options “--pe --optdist 10000 --dupfrac 0.15 --mapq 10 --cutoff 2 --tdep 10 --peaksize 500 -  
709 -peakgap 100 --species mouse --chrskip ‘chrMIPhiX’ --blacklist mm10.blacklist.bed”.

710

### 711 **Immunoprecipitation**

712 Cells were lysed with Cell Lysis Buffer (Life Technologies) in the presence of protease inhibitors  
713 (EDTA-free tablet, Roche). IP was performed using 500  $\mu$ g of extract. Extracts were incubated  
714 with 4  $\mu$ g of anti-Utx (Cell Signaling, D3Q11) or Oct1 (Novus Biologicals, NBP2-21584) antibodies,  
715 or rabbit IgG control overnight at 4°C. Protein-antibody complexes were precipitated with protein-  
716 G magnetic beads (Thermo Fisher) for 3 hr at 4°C with rotation and washed 3 times with Low Salt  
717 buffer (20 mM Tris-HCl pH 8.0, 150 mM NaCl, 2 mM EDTA, 0.1% SDS, 1% Triton X-100) plus  
718 protease inhibitors. Precipitated proteins were analyzed by immunoblot.

719

### 720 **Bulk RNA-seq**

721 RNA was prepared from three independent cultures of undifferentiated or 3 d and 6 d MD-  
722 differentiated parental or cKO ESCs. Poly(A) RNA was purified from total RNA samples (100–500  
723 ng) with oligo(dT) magnetic beads, and stranded mRNA sequencing libraries were prepared as  
724 described using the Illumina TruSeq mRNA library preparation kit and RNA UD Indexes. Molarity



725 of adapter-modified molecules was defined by qPCR using the Kapa Biosystems Library Quant  
726 Kit. Individual libraries were normalized to 1.3 nM. Sequencing libraries were chemically  
727 denatured and applied to an Illumina NovaSeq flow cell using the NovaSeq XP chemistry  
728 workflow. Following transfer of the flowcell to an Illumina NovaSeq instrument, 2×51 cycle paired-  
729 end sequence was performed using a NovaSeq S1 reagent kit. Between 13 and 18 million paired-  
730 end reads were generated for each condition. More than 99% of aligned reads mapping to the  
731 correct strand.

732

### 733 **Bulk RNA-seq analysis**

734 The Illumina adapter sequence was trimmed using cutadapt version 1.16. Fastq data quality were  
735 checked using Fastqc version 0.11.5. Reads were aligned to the mouse *Mm10* genome using  
736 STAR version 2.7.3a in two-pass mode. Aligned reads were checked for quality using the Picard  
737 tools' CollectRnaSeqMetrics command to count the number of read-matching exons, UTRs,  
738 introns and intergenic regions, and to calculate normalized gene coverage from the top 1000  
739 expressed transcripts. Between 13 and 18 million paired-end reads were generated for each  
740 condition, with >99% of aligned reads mapping to the correct strand. Differentially expressed  
741 genes were identified using a 5% FDR with DESeq2 version 1.24.0 (Love et al., 2014). Genes  
742 with a count of at least 50 in one or more samples were tested. Genes showing at least 2.5-fold  
743 change of expression at an adjusted  $p < 0.01$  were selected as differentially expressed. Figures  
744 were generated in R version 4.0.0 using functions from ggplots libraries and pheatmap.

745

### 746 **Luciferase reporter assay**

747 Single or combination mutations were introduced into the Oct1 and Smad consensus binding sites  
748 in the following mouse *Myog* regulatory element (*Mm10* chr1:134,285,666-134,285,750). IDT g-  
749 blocks® were synthesized to contain WT sequences or single or combined mutations in the Oct1  
750 or Smad binding sites, fused upstream of the CMV basal promoter (-216-13 relative to TSS). G-  
751 blocks were inserted using sequence- and ligase-independent cloning (Li and Elledge, 2012)  
752 upstream of the coding sequence for a secreted nano-luciferase following digestion of vector  
753 pNL2.3 (Promega) using *EcoRV* and *HindIII*. The veracity of the cloned inserts was confirmed by  
754 Sanger sequencing. 200 ng of reporter plasmid were co-transfected into Oct1-deficient MEFs  
755 (Shakya et al., 2009) in DMEM media lacking phenol red (ThermoFisher) together with 400 ng  
756 MMP9-mCherry (Wider and Picard, 2017) in xxx ng total transfected DNA. Where indicated, 400  
757 ng pBabePuro-Oct1 was included in the transfection mix. pUC18 plasmid comprised the balance

758 of the transfected DNA. Where indicated, transfected cells were provided with 5 ng recombinant  
759 mouse TGFb1 protein (R&D Systems). mCherry fluorescence was determined first by exciting at  
760 570 nm and measuring emission at 610 nm with a 100 msec time delay using an Envision Xcite  
761 Multilabel Plate Reader . Luminescence was measured using Nano-Glo Luciferase (Promega)  
762 and a Modulus luminescence plate reader.

763

#### 764 **Immunofluorescence**

765 Immunofluorescence was performed as described previously (Gnocchi et al., 2009) with  
766 modifications, using rabbit anti-H3K27me3 (Milipore) and mouse anti-MyHC-emb (eMyHC,  
767 Developmental Hybridoma bank) antibodies. Secondary antibodies were goat anti-rabbit-  
768 Alexa568 and anti-mouse-Alexa568 (ThermoFisher).

769

#### 770 **Retroviral Oct1 overexpression**

771 Oct1 was ectopically expressed in ESC cells using a previously described retroviral vector  
772 (pBabePuro-Oct1) (Kang et al., 2009b). pBabePuro was used as an empty vector control. The  
773 vector was co-transfected together with the pCL-Eco packaging plasmid into HEK293T cells to  
774 generate retroviral particles. Retroviral supernatants were collected 48 hr later, filtered through  
775 0.45  $\mu$ m filters and applied to ESCs cultures maintained on puromycin-resistant feeder fibroblasts  
776 (ThermoFisher). The mixed population of cells was subjected to selection with puromycin for 48  
777 hr.

778

#### 779 **Metabolic profiling**

780 Cold 90% methanol (MeOH) was added to each sample to give a final concentration of 80%.  
781 Samples were then incubated at -20°C for 1 hr. After incubation the samples were centrifuged at  
782 20,000 $\times$ g for 10 min at 4°C. The supernatant was then transferred from each sample tube into a  
783 labeled, fresh micro centrifuge tube. Pooled quality control samples were made by removing a  
784 fraction of collected supernatant from each sample and process blanks were made using only  
785 extraction solvent and no cell culture. The samples were then dried en vacuo. GC-MS was  
786 performed with an Agilent 5977b GC-MS MSD-HES and an Agilent 7693A automatic liquid  
787 sampler. Data were analyzed using in-house software to prepare for analysis by the  
788 "MetaboAnalyst" software tool (Chong et al., 2018). Statistical analysis was performed using  
789 MetaboAnalystR.

790 **ACKNOWLEDGEMENTS**

791

792 We thank G. Kardon and C. Kikani for critical reading of the manuscript. We thank B. Dalley and  
793 O. Allen at the HCI High-Throughput Genomics facility and T. Parnell and B. Lohman at the HCI  
794 Bioinformatic Analysis Shared Resource for assistance with ChIP-seq and scRNA-seq. We thank  
795 James E. Cox and Tyler Van Ry from the Metabolomics Core for their assistance with  
796 metabolomic profiling. We thank Olivier Pourquié from the Harvard Medical School for the  
797 assistance with the mesodermal differentiation protocols. We thank D. Picard and D. Wider for  
798 the MMP9-mCherry construct. This work was supported by a grant from the National Institutes of  
799 Health/National Institute of General Medical Sciences (R01GM122778) to DT.

800 *Author contributions:* DT conceived the study, and provided administrative and material  
801 support. JP conceived and supervised experiments, designed experiments and acquired and  
802 interpreted data. YW, ZS acquired and interpreted data. MBC generated reagents and analyzed  
803 data. All authors were involved in writing, reviewing and revising the manuscript.

804 **REFERENCES**

805

806 Abascal, F., Acosta, R., Addleman, N.J., Adrian, J., Afzal, V., Aken, B., Akiyama, J.A., Jammal,  
807 O. Al, Amrhein, H., Anderson, S.M., et al. (2020). Expanded encyclopaedias of DNA elements in  
808 the human and mouse genomes. *Nature* *583*, 699–710.

809 Bain, G., Kitchens, D., Yao, M., Huettner, J.E., and Gottlieb, D.I. (1995). Embryonic stem cells  
810 express neuronal properties in vitro. *Dev. Biol.* *168*, 342–357.

811 Beddington, R.S.P., and Robertson, E.J. (1989). An assessment of the developmental potential  
812 of embryonic stem cells in the midgestation mouse embryo. *Development* *105*, 733–737.

813 Bernstein, B.E., Mikkelsen, T.S., Xie, X., Kamal, M., Huebert, D.J., Cuff, J., Fry, B., Meissner,  
814 A., Wernig, M., Plath, K., et al. (2006). A bivalent chromatin structure marks key developmental  
815 genes in embryonic stem cells. *Cell* *125*, 315–326.

816 Chal, J., Oginuma, M., Tanoury, Z. Al, Gobert, B., Sumara, O., Hick, A., Bousson, F., Zidouni,  
817 Y., Mursch, C., Moncuquet, P., et al. (2015). Differentiation of pluripotent stem cells to muscle  
818 fiber to model Duchenne muscular dystrophy. *Nat. Biotechnol.* *33*, 962–969.

819 Chong, J., Soufan, O., Li, C., Caraus, I., Li, S., Bourque, G., Wishart, D.S., and Xia, J. (2018).  
820 MetaboAnalyst 4.0: Towards more transparent and integrative metabolomics analysis. *Nucleic*  
821 *Acids Res.* *46*, W486–W494.

822 Cliff, T.S., Wu, T., Boward, B.R., Yin, A., Yin, H., Glushka, J.N., Prestegard, J.H., and Dalton,  
823 S. (2017). MYC Controls Human Pluripotent Stem Cell Fate Decisions through Regulation of  
824 Metabolic Flux. *Cell Stem Cell* *21*, 502–516.e9.

825 Cloos, P.A.C., Christensen, J., Agger, K., and Helin, K. (2008). Erasing the methyl mark:  
826 Histone demethylases at the center of cellular differentiation and disease. *Genes Dev.* *22*,  
827 1115–1140.

828 Collinson, A., Collier, A.J., Morgan, N.P., Sienerth, A.R., Chandra, T., Andrews, S., and Rugg-  
829 Gunn, P.J. (2016). Deletion of the Polycomb-Group Protein EZH2 Leads to Compromised Self-  
830 Renewal and Differentiation Defects in Human Embryonic Stem Cells. *Cell Rep.*

831 Conlon, F.L., Lyons, K.M., Takaesu, N., Barth, K.S., Kispert, A., Herrmann, B., and Robertson,  
832 E.J. (1994). A primary requirement for nodal in the formation and maintenance of the primitive  
833 streak in the mouse. *Trends Genet.* *10*, 308–308.

834 Dell’Orso, S., Juan, A.H., Ko, K.-D., Naz, F., Perovanovic, J., Gutierrez-Cruz, G., Feng, X., and  
835 Sartorelli, V. (2019). Correction: Single cell analysis of adult mouse skeletal muscle stem cells in  
836 homeostatic and regenerative conditions (doi: 10.1242/dev.174177). *Development* *146*,

837 dev181743.

838 Dhar, S.S., Lee, S.H., Chen, K., Zhu, G., Oh, W.K., Allton, K., Gafni, O., Kim, Y.Z., Tomoiga,  
839 A.S., Barton, M.C., et al. (2016). An essential role for UTX in resolution and activation of  
840 bivalent promoters. *Nucleic Acids Res.* *44*, 3659–3674.

841 Diaz-Cuadros, M., Wagner, D.E., Budjan, C., Hubaud, A., Tarazona, O.A., Donnelly, S., Michaut,  
842 A., Al Tanoury, Z., Yoshioka-Kobayashi, K., Niino, Y., et al. (2020). In vitro characterization of  
843 the human segmentation clock. *Nature* *580*, 113–118.

844 Gnocchi, V.F., White, R.B., Ono, Y., Ellis, J.A., and Zammit, P.S. (2009). Further  
845 characterisation of the molecular signature of quiescent and activated mouse muscle satellite  
846 cells. *PLoS One* *4*, e5205.

847 Guibentif, C., Griffiths, J.A., Imaz-Rosshandler, I., Ghazanfar, S., Nichols, J., Wilson, V.,  
848 Göttgens, B., and Marioni, J.C. (2021). Diverse Routes toward Early Somites in the Mouse  
849 Embryo. *Dev. Cell* *56*, 141–153.e6.

850 Heinz, S., Benner, C., Spann, N., Bertolino, E., Lin, Y.C., Laslo, P., Cheng, J.X., Murre, C.,  
851 Singh, H., and Glass, C.K. (2010). Simple Combinations of Lineage-Determining Transcription  
852 Factors Prime cis-Regulatory Elements Required for Macrophage and B Cell Identities. *Mol.*  
853 *Cell* *38*, 576–589.

854 Hnisz, D., Abraham, B.J., Lee, T.I., Lau, A., Saint-André, V., Sigova, A.A., Hoke, H.A., and  
855 Young, R.A. (2013). Super-enhancers in the control of cell identity and disease. *Cell* *155*, 934–  
856 947.

857 Kang, J., Gemberling, M., Nakamura, M., Whitby, F.G., Handa, H., Fairbrother, W.G., and  
858 Tantin, D. (2009a). A general mechanism for transcription regulation by Oct1 and Oct4 in  
859 response to genotoxic and oxidative stress. *Genes Dev.* *23*, 208–222.

860 Kang, J., Gemberling, M., Nakamura, M., Whitby, F.G., Handa, H., Fairbrother, W.G., and  
861 Tantin, D. (2009b). A general mechanism for transcription regulation by Oct1 and Oct4 in  
862 response to genotoxic and oxidative stress. *Genes Dev.* *23*, 208–222.

863 Ku, M., Koche, R.P., Rheinbay, E., Mendenhall, E.M., Endoh, M., Mikkelsen, T.S., Presser, A.,  
864 Nusbaum, C., Xie, X., Chi, A.S., et al. (2008). Genomewide Analysis of PRC1 and PRC2  
865 Occupancy Identifies Two Classes of Bivalent Domains. *PLoS Genet.* *4*, e1000242.

866 Lachmann, A., Xu, H., Krishnan, J., Berger, S.I., Mazloom, A.R., and Ma'ayan, A. (2010). ChEA:  
867 Transcription factor regulation inferred from integrating genome-wide ChIP-X experiments.  
868 *Bioinformatics* *26*, 2438–2444.

869 Li, M.Z., and Elledge, S.J. (2012). SLIC: A method for sequence- and ligation-independent

870 cloning. *Methods Mol. Biol.* *852*, 51–59.

871 Liu, Z., Lin, X., Cai, Z., Zhang, Z., Han, C., Jia, S., Meng, A., and Wang, Q. (2011). Global  
872 identification of SMAD2 target genes reveals a role for multiple co-regulatory factors in zebrafish  
873 early gastrulas. *J. Biol. Chem.* *286*, 28520–28532.

874 Love, M.I., Huber, W., and Anders, S. (2014). Moderated estimation of fold change and  
875 dispersion for RNA-seq data with DESeq2. *Genome Biol.* *15*, 550.

876 La Manno, G., Soldatov, R., Zeisel, A., Braun, E., Hochgerner, H., Petukhov, V., Lidschreiber,  
877 K., Kastrioti, M.E., Lönnerberg, P., Furlan, A., et al. (2018). RNA velocity of single cells. *Nature*  
878 *560*, 494–498.

879 McLean, C.Y., Bristor, D., Hiller, M., Clarke, S.L., Schaar, B.T., Lowe, C.B., Wenger, A.M., and  
880 Bejerano, G. (2010). GREAT improves functional interpretation of cis-regulatory regions. *Nat.*  
881 *Biotechnol.* *28*, 495–501.

882 Meshorer, E., and Misteli, T. (2006). Chromatin in pluripotent embryonic stem cells and  
883 differentiation. *Nat. Rev. Mol. Cell Biol.* *7*, 540–546.

884 Mullen, A.C., Orlando, D.A., Newman, J.J., Lovén, J., Kumar, R.M., Bilodeau, S., Reddy, J.,  
885 Guenther, M.G., DeKoter, R.P., and Young, R.A. (2011). Master transcription factors determine  
886 cell-type-specific responses to TGF- $\beta$  signaling. *Cell* *147*, 565–576.

887 Nichols, J., Zevnik, B., Anastassiadis, K., Niwa, H., Klewe-Nebenius, D., Chambers, I., Schöler,  
888 H., and Smith, A. (1998). Formation of pluripotent stem cells in the mammalian embryo depends  
889 on the POU transcription factor Oct4. *Cell* *95*, 379–391.

890 Oginuma, M., Moncuquet, P., Xiong, F., Karoly, E., Chal, J., Guevorkian, K., and Pourquié, O.  
891 (2017). A Gradient of Glycolytic Activity Coordinates FGF and Wnt Signaling during Elongation  
892 of the Body Axis in Amniote Embryos. *Dev. Cell* *40*, 342–353.e10.

893 Palmieri, S.L., Peter, W., Hess, H., and Schöler, H.R. (1994). Oct-4 transcription factor is  
894 differentially expressed in the mouse embryo during establishment of the first two  
895 extraembryonic cell lineages involved in implantation. *Dev. Biol.* *166*, 259–267.

896 Perovanovic, J., DellOrso, S., Gnoch, V.F., Jaiswal, J.K., Sartorelli, V., Vigouroux, C.,  
897 Mamchaoui, K., Mouly, V., Bonne, G., and Hoffman, E.P. (2016). Laminopathies disrupt  
898 epigenomic developmental programs and cell fate. *Sci. Transl. Med.* *8*, 335ra58–335ra58.

899 Schlesinger, S., and Meshorer, E. (2019). Open Chromatin, Epigenetic Plasticity, and Nuclear  
900 Organization in Pluripotency. *Dev. Cell* *48*, 135–150.

901 Sebastiano, V., Dalvai, M., Gentile, L., Schubart, K., Sutter, J., Wu, G.M., Tapia, N., Esch, D.,  
902 Ju, J.Y., Hübner, K., et al. (2010). Oct1 regulates trophoblast development during early mouse

903 embryogenesis. *Development* *137*, 3551–3560.

904 Seydoux, G., and Braun, R.E. (2006). Pathway to Totipotency: Lessons from Germ Cells. *Cell*  
905 *127*, 891–904.

906 Shakya, A., Cooksey, R., Cox, J.E., Wang, V., McClain, D.A., and Tantin, D. (2009). Oct1 loss  
907 of function induces a coordinate metabolic shift that opposes tumorigenicity. *Nat. Cell Biol.* *11*,  
908 320–327.

909 Shakya, A., Kang, J., Chumley, J., Williams, M.A., and Tantin, D. (2011). Oct1 is a switchable,  
910 bipotential stabilizer of repressed and inducible transcriptional states. *J. Biol. Chem.* *286*, 450–  
911 459.

912 Shen, Z., Kang, J., Shakya, A., Tabaka, M., Jarboe, E.A., Regev, A., and Tantin, D. (2017).  
913 Enforcement of developmental lineage specificity by transcription factor Oct1. *Elife* *6*.

914 Stuart, T., Butler, A., Hoffman, P., Hafemeister, C., Papalexi, E., Mauck, W.M., Hao, Y.,  
915 Stoeckius, M., Smibert, P., and Satija, R. (2019). Comprehensive Integration of Single-Cell  
916 Data. *Cell* *177*, 1888–1902.e21.

917 Takahashi, K., and Yamanaka, S. (2006). Induction of Pluripotent Stem Cells from Mouse  
918 Embryonic and Adult Fibroblast Cultures by Defined Factors. *Cell* *126*, 663–676.

919 Tantin, D. (2013). Oct transcription factors in development and stem cells: insights and  
920 mechanisms. *Development* *140*, 2857–2866.

921 Trapnell, C., Cacchiarelli, D., Grimsby, J., Pokharel, P., Li, S., Morse, M., Lennon, N.J., Livak,  
922 K.J., Mikkelsen, T.S., and Rinn, J.L. (2014). The dynamics and regulators of cell fate decisions  
923 are revealed by pseudotemporal ordering of single cells. *Nat. Biotechnol.* *32*, 381–386.

924 Wang, V.E.H., Schmidt, T., Chen, J., Sharp, P.A., and Tantin, D. (2004). Embryonic Lethality,  
925 Decreased Erythropoiesis, and Defective Octamer-Dependent Promoter Activation in Oct-1-  
926 Deficient Mice. *Mol. Cell. Biol.* *24*, 1022–1032.

927 Wider, D., and Picard, D. (2017). Secreted dual reporter assay with Gaussia luciferase and the  
928 red fluorescent protein mCherry. *PLoS One* *12*, e0189403.

929 Zhang, Y., Lahmann, I., Baum, K., Shimojo, H., Mourikis, P., Wolf, J., Kageyama, R., and  
930 Birchmeier, C. (2021). Oscillations of Delta-like1 regulate the balance between differentiation  
931 and maintenance of muscle stem cells. *Nat. Commun.* *12*.

932 Zhou, X., Sasaki, H., Lowe, L., Hogan, B.L.M., and Kuehn, M.R. (1993). Nodal is a novel TGF-  
933  $\beta$ -like gene expressed in the mouse node during gastrulation. *Nature* *361*, 543–547.

934

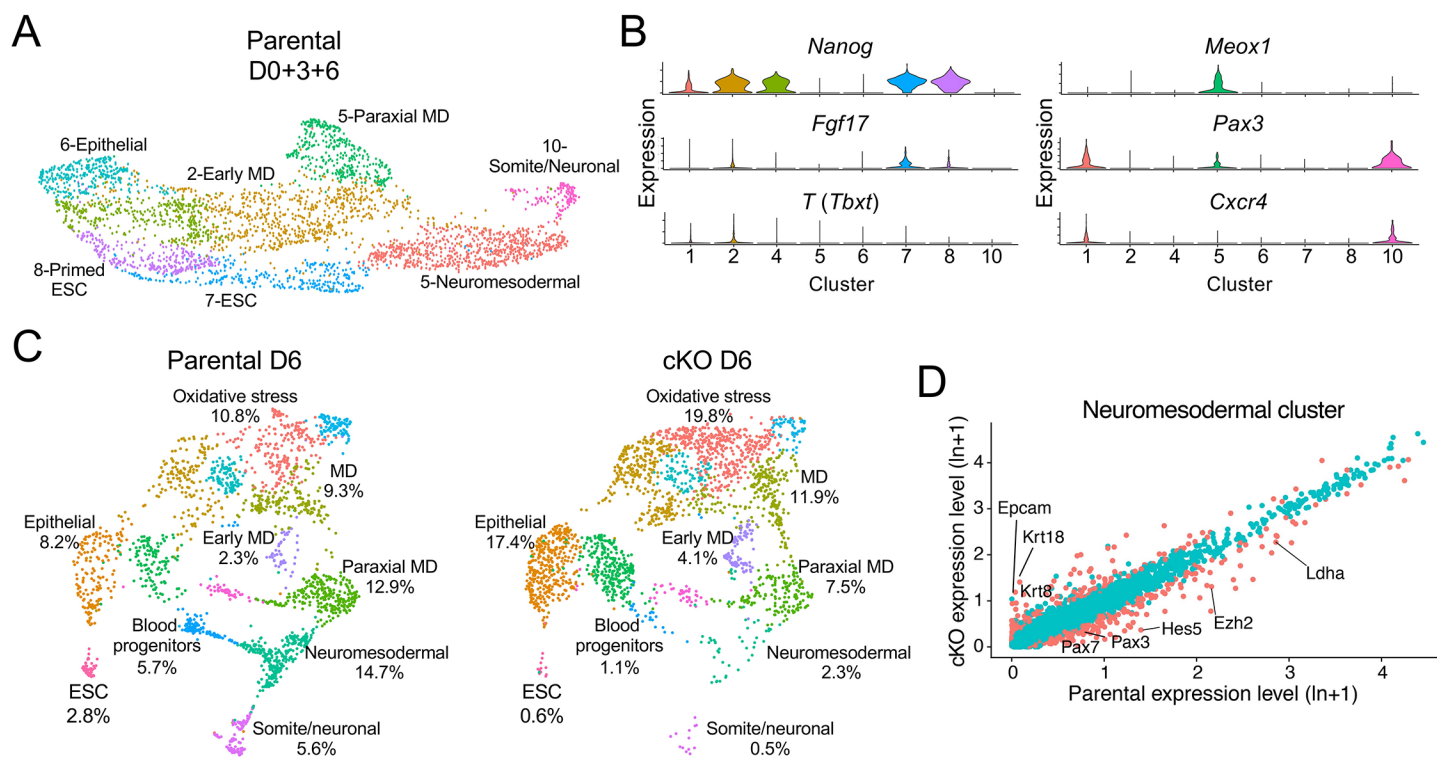



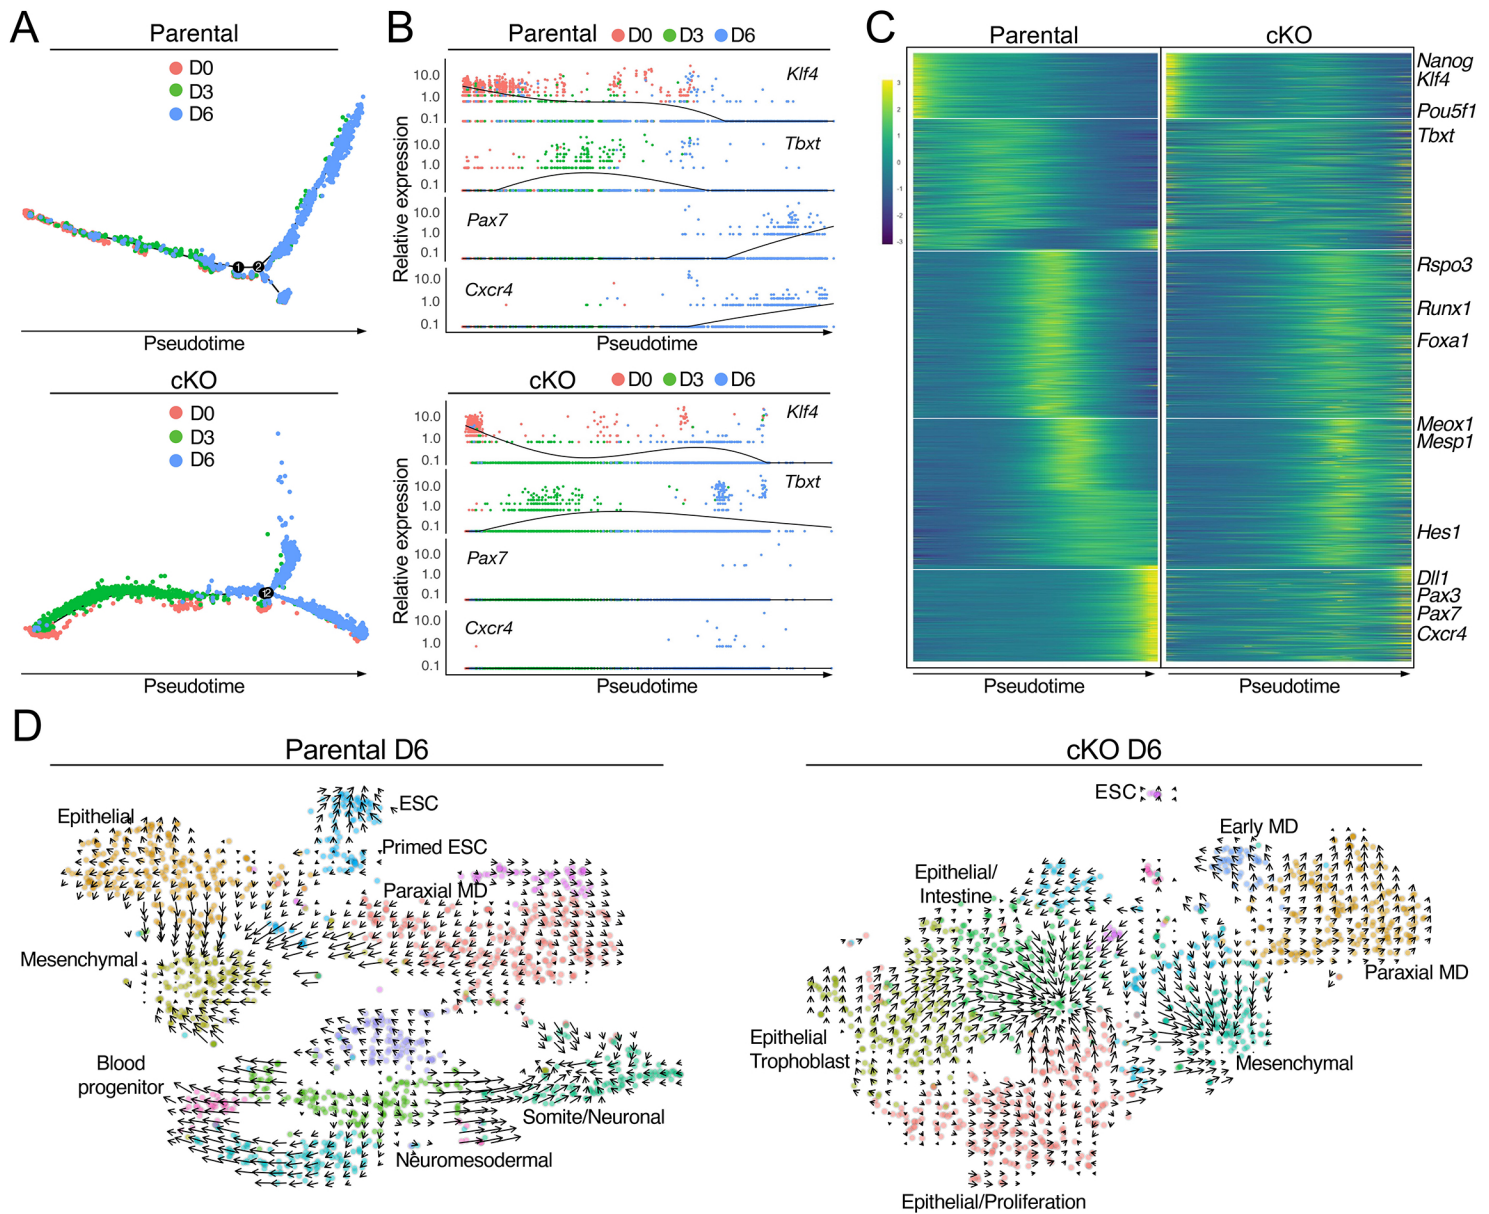

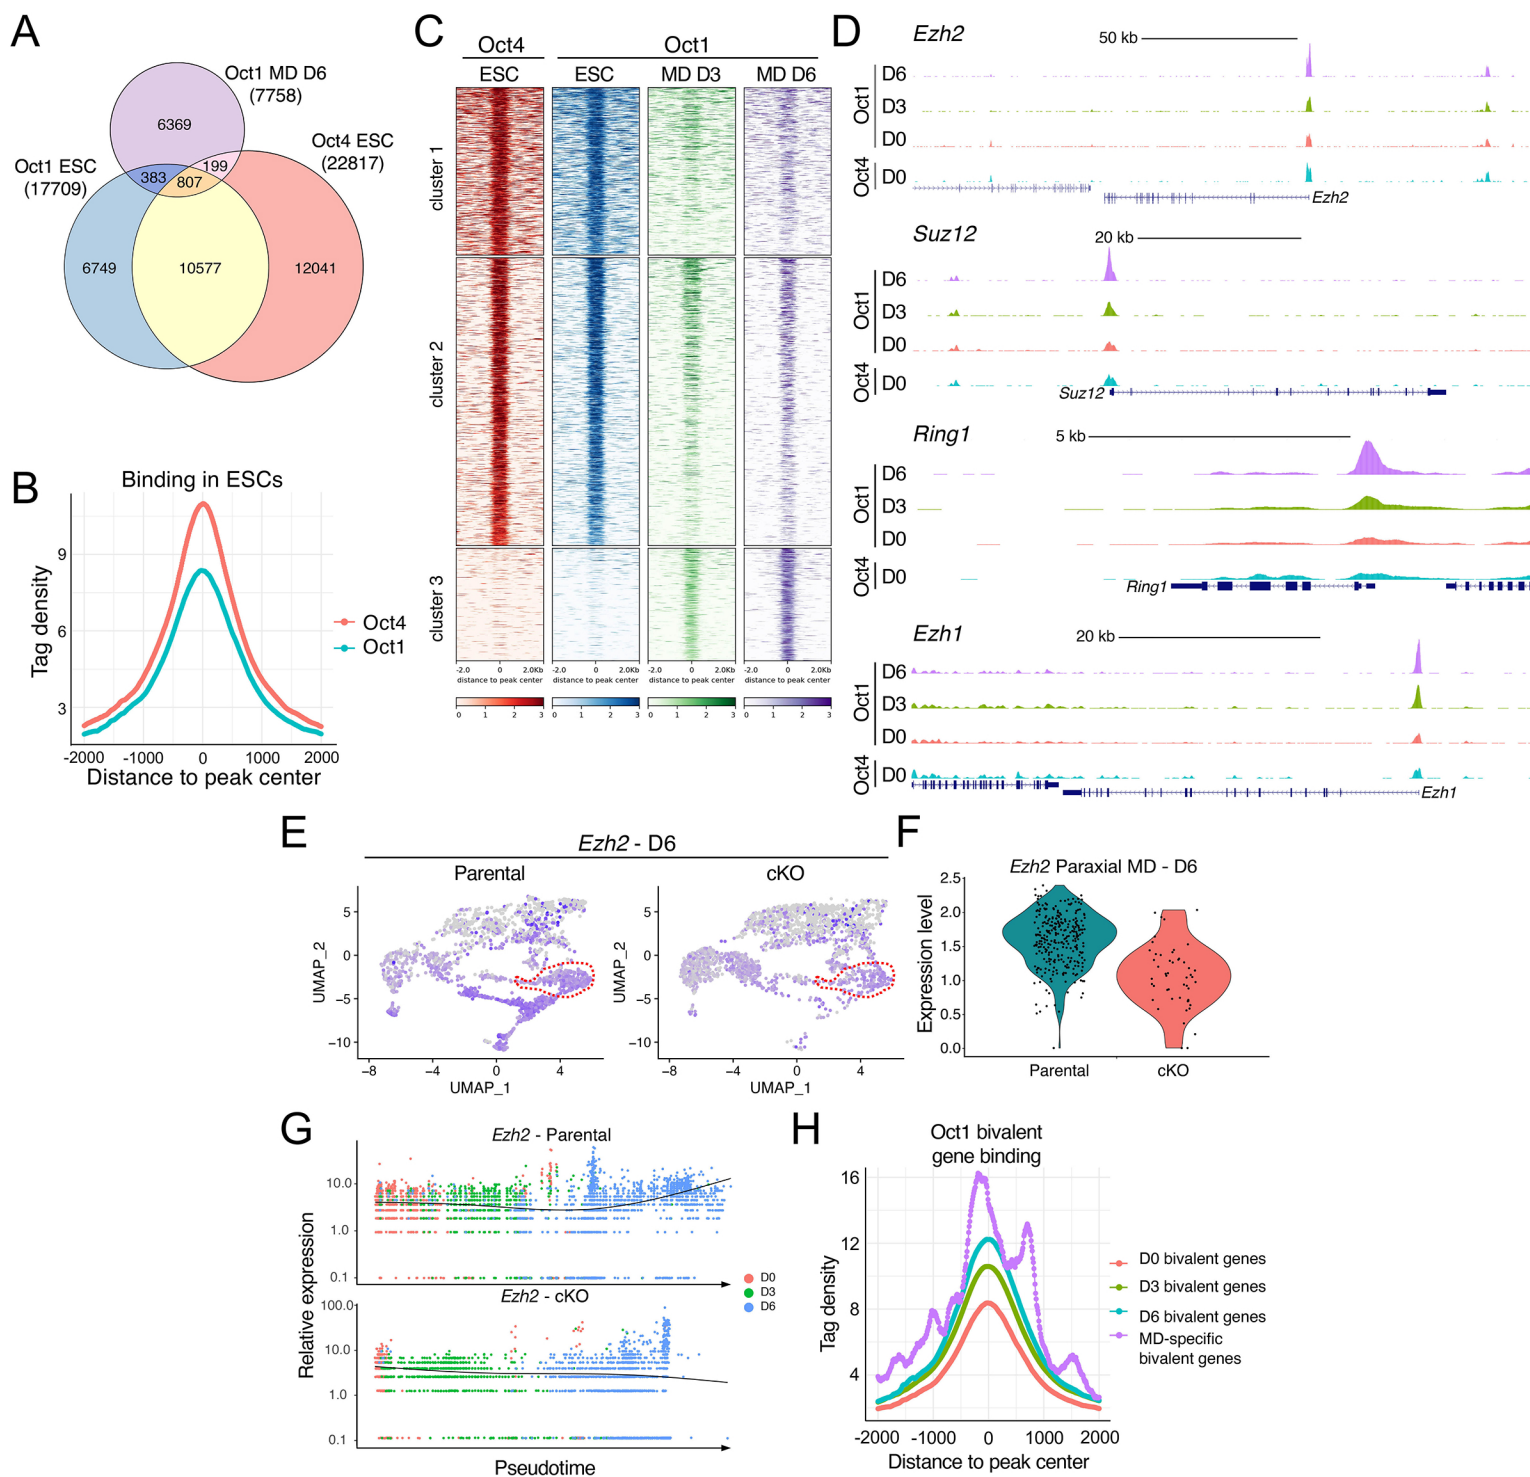

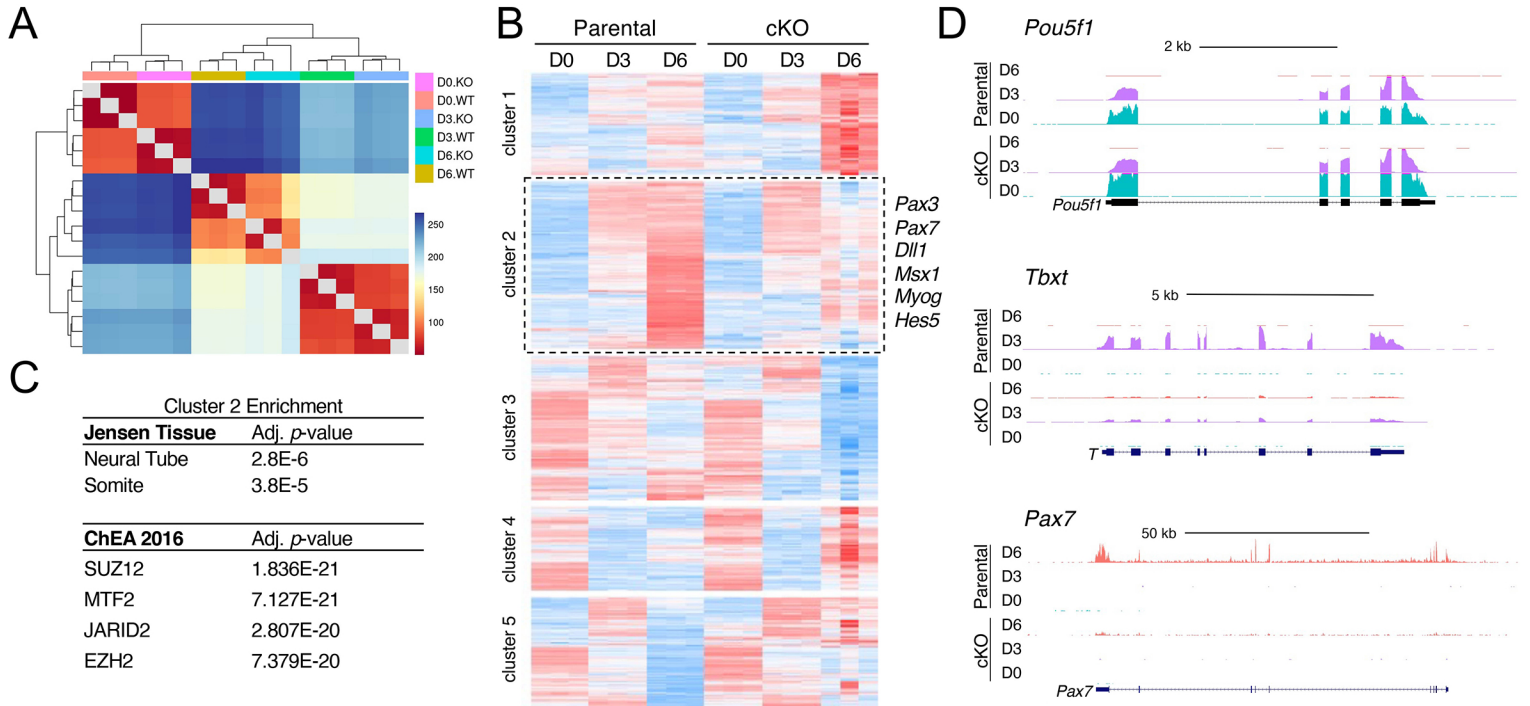

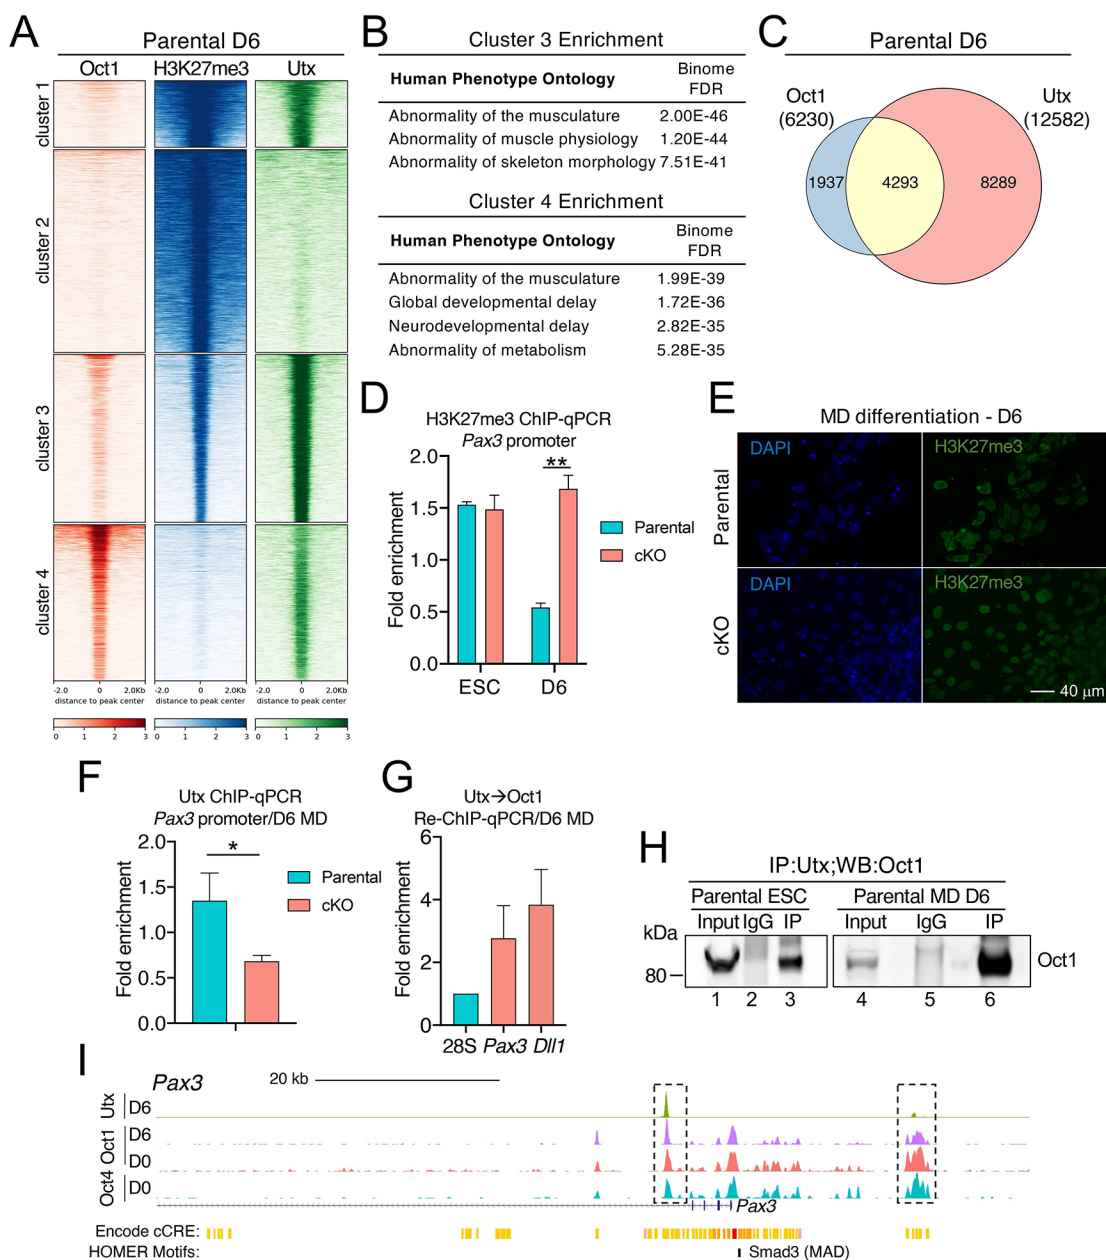

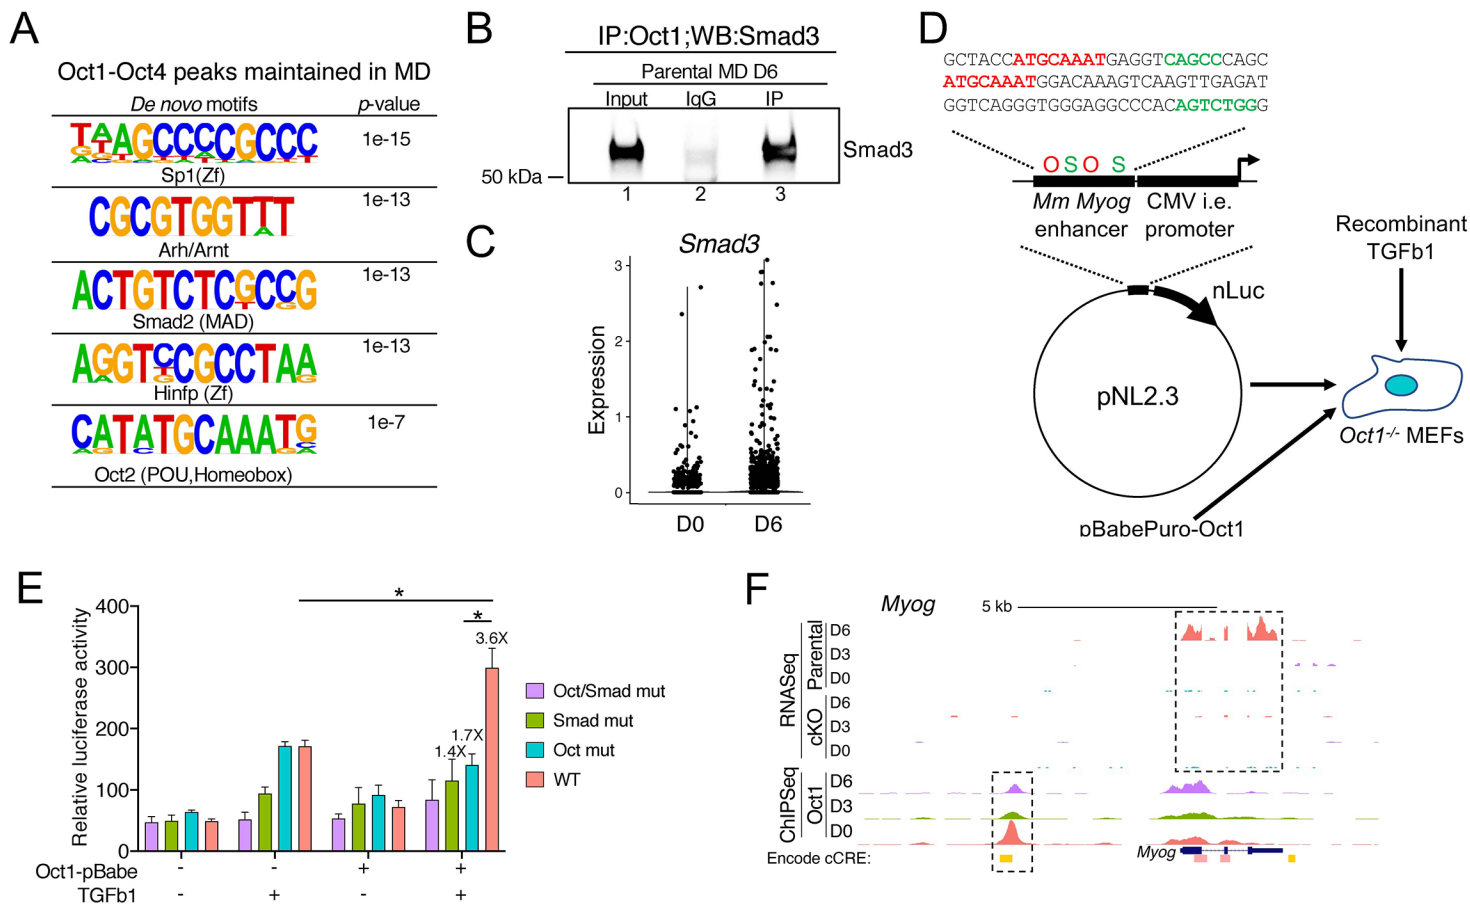

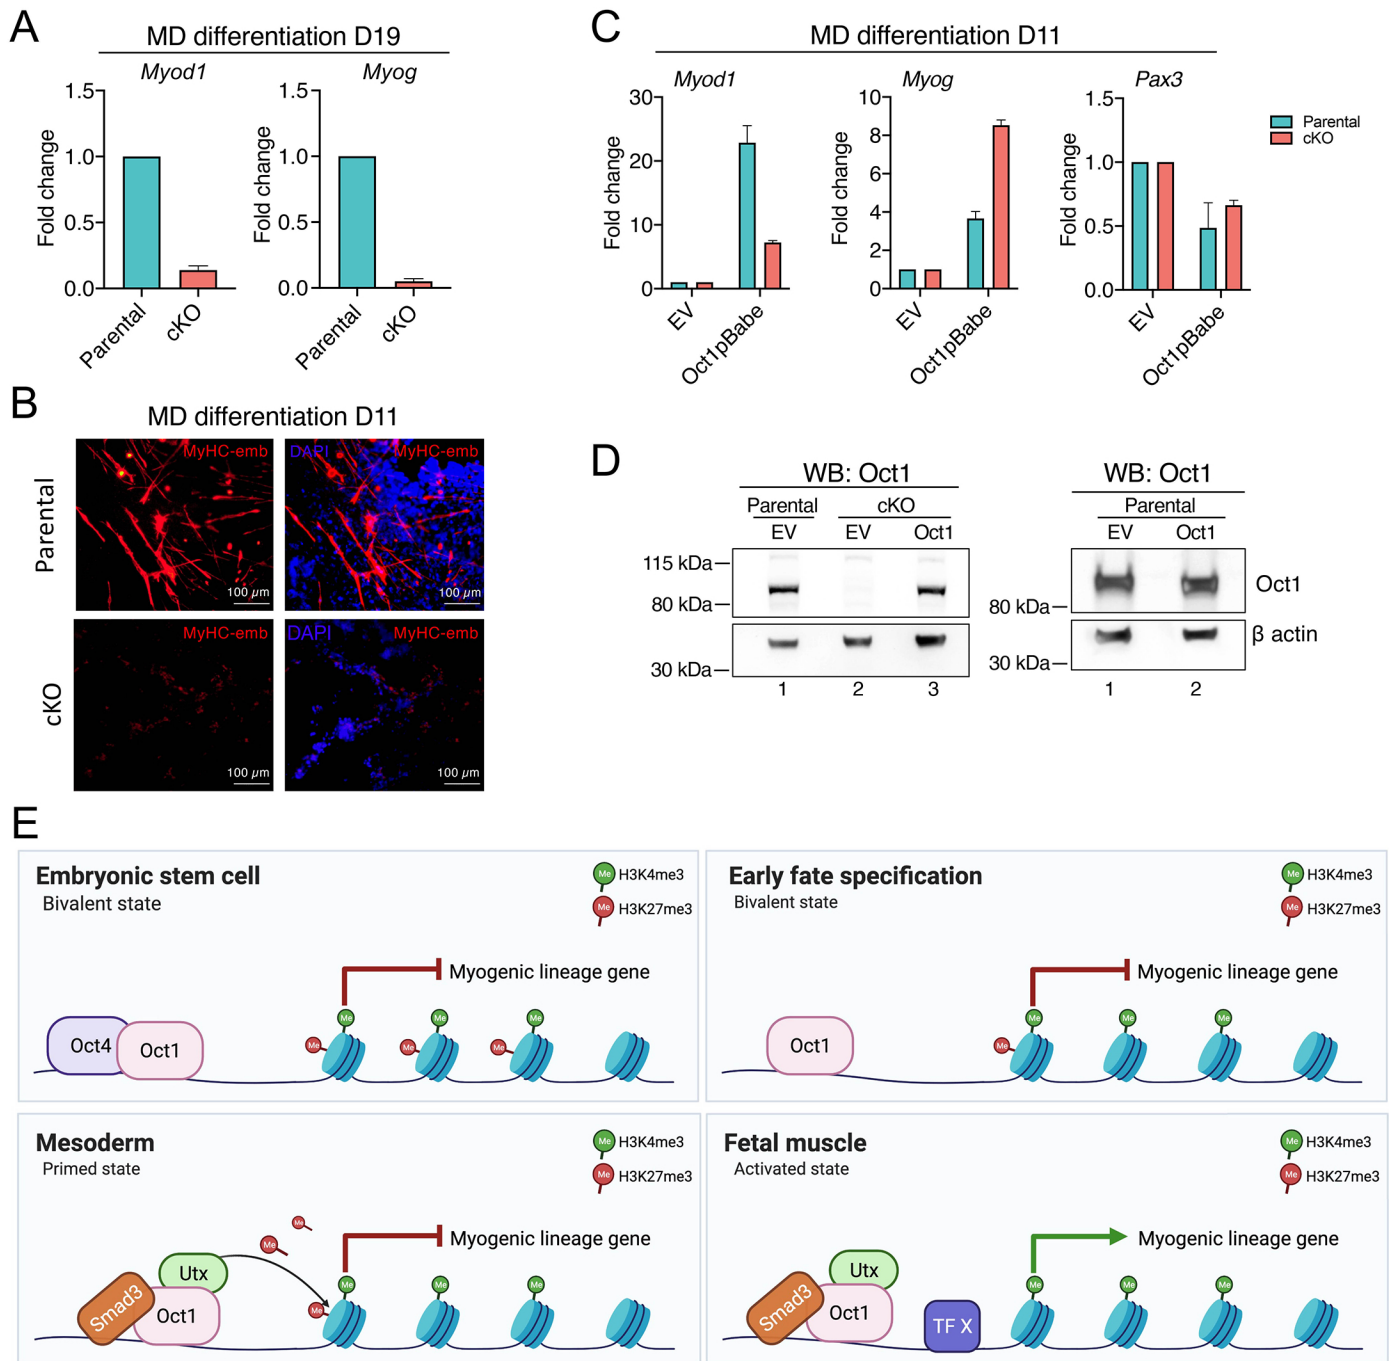

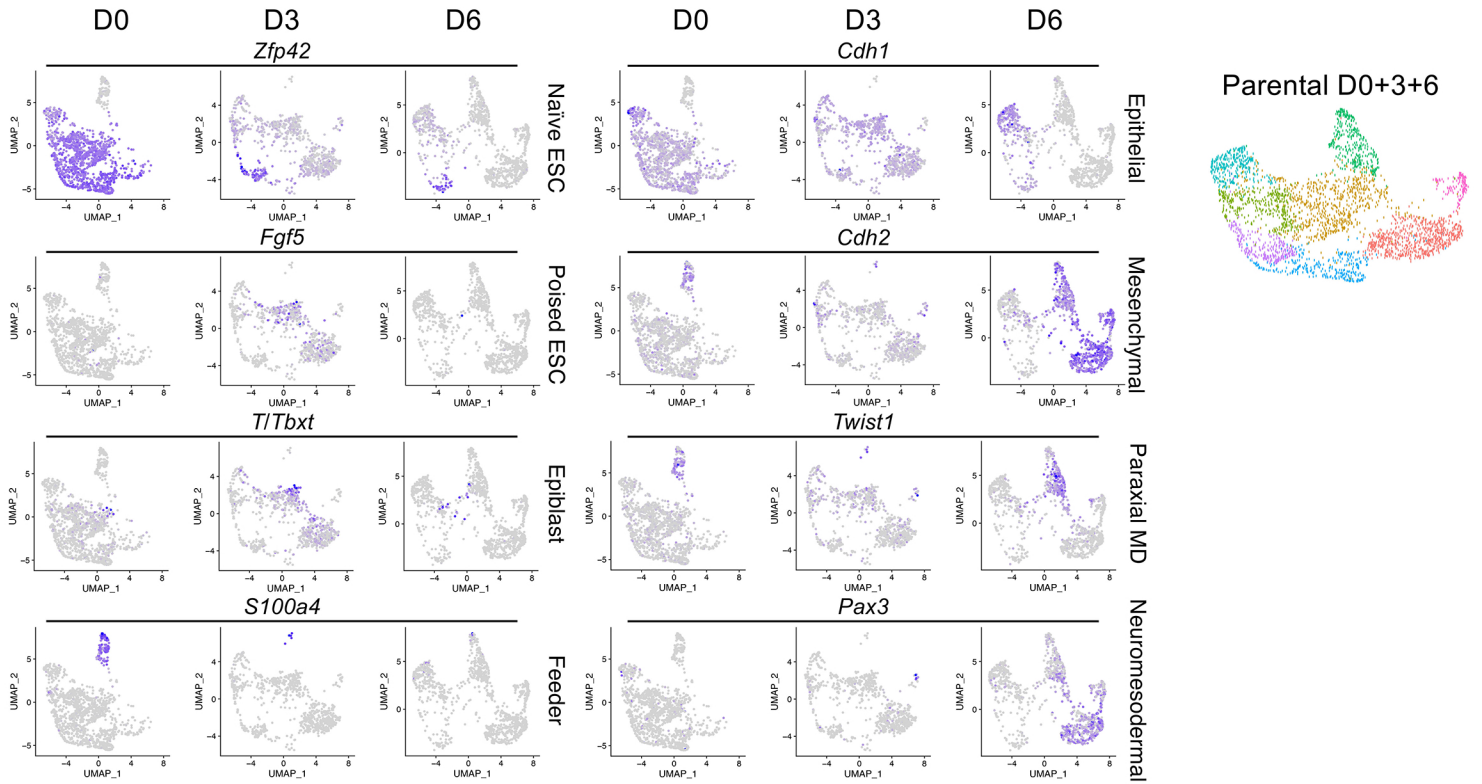

**Figure S1. Expression of selected genes in UMAP clusters of pluripotent cells and cells at MD differentiation D3 and D6.**

Expression of eight different genes that highlight specific clusters is shown. Right: clusters are highlighted in undifferentiated, MD D3- and MD D6-differentiated cells similar to Figure 1A.

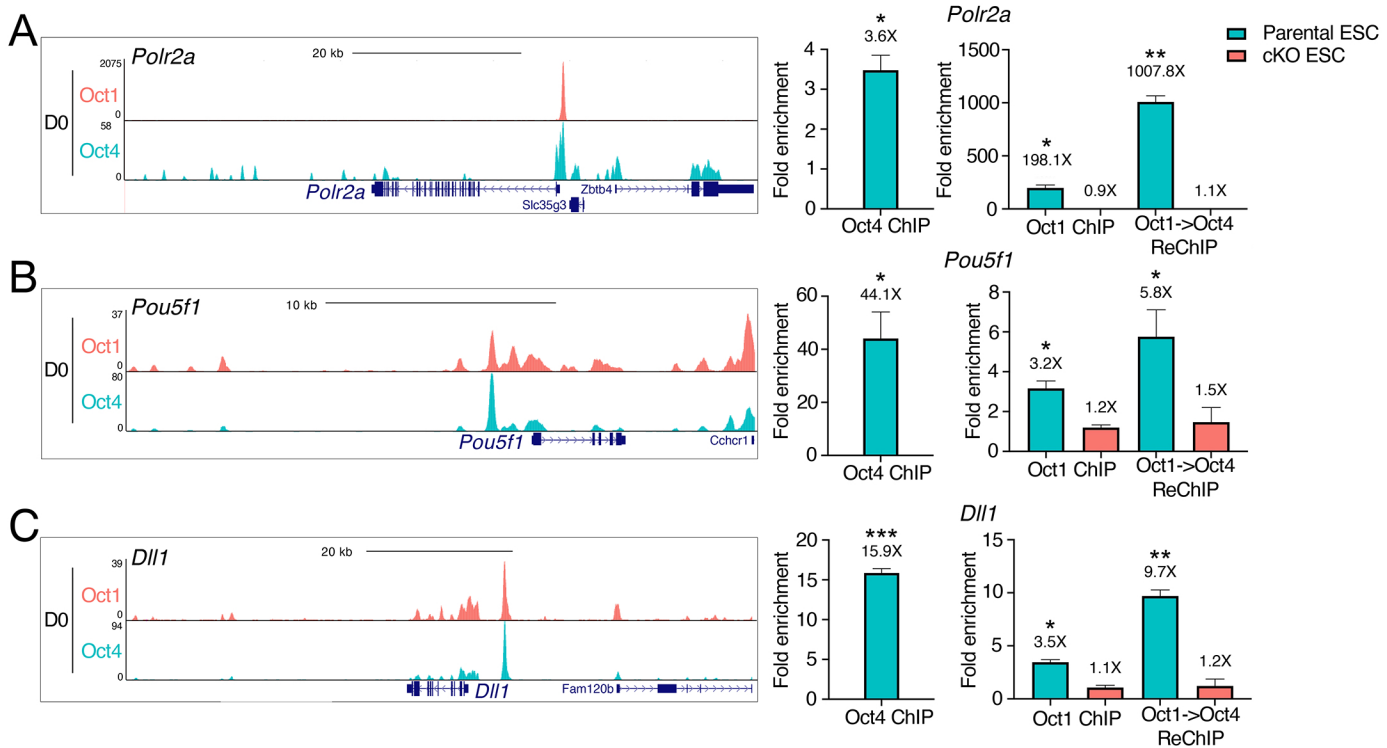

**Figure S2. Oct1 and Oct4 binding and co-binding in ESC cells (D0 of differentiation).**

(A) ChIP-seq signal tracks for *Polr2a* promoter are shown at left. Plot in center shows Oct1 and Oct4 ChIP-qPCR fold enrichment relative to a nonspecific 40S rRNA genomic region. At far right is Oct1 → Oct4 sequential ChIP-qPCR (re-ChIP). qPCR data were normalized to a 40S rRNA nonspecific genomic region. An average of three biological replicates are shown. Error bars depict ±SEM. \* *p*-value <0.05, \*\* *p*-value <0.01, \*\*\* *p*-value <0.001.

(B) Similar data for the *Pou5f1* enhancer.

(C) Similar data for the *Dll1* enhancer.



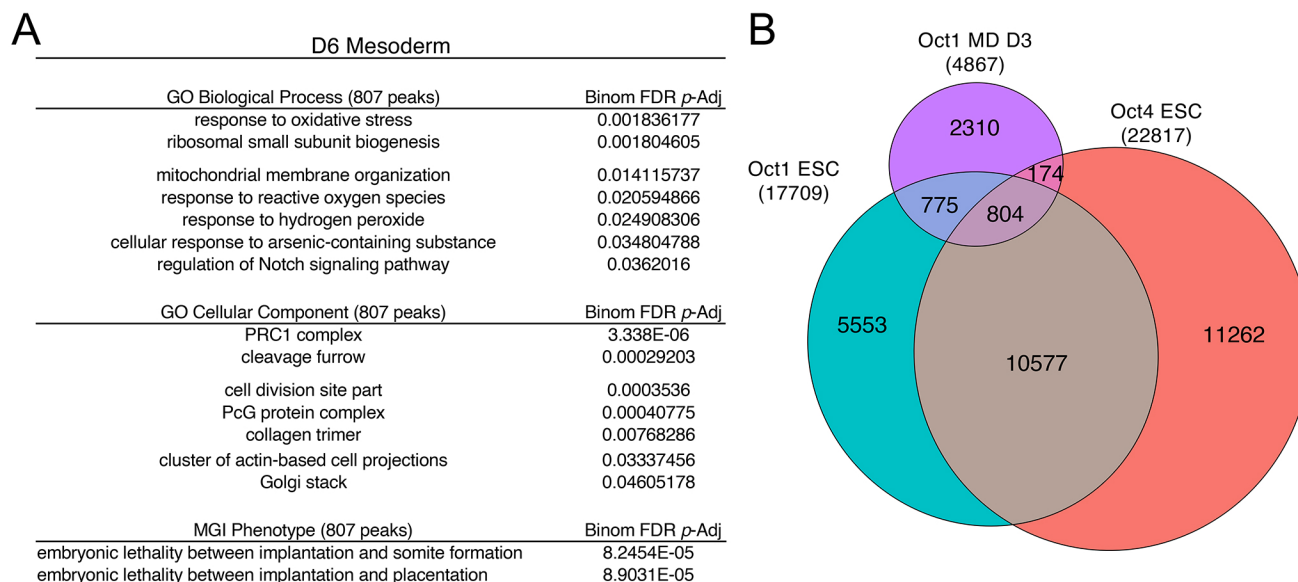

**Figure S3. Oct1 binding shifts from predominantly distal peaks in ESCs to promoter peaks in MD D6 differentiated cells.**

(A) Top enriched GO terms in MD D6 Oct1-bound peaks maintained during differentiation (shared with Oct1- and Oct4-bound peaks in ESCs, 807 peaks).

(B) Venn diagram similar to Figure 3A except showing common and unique binding peaks in MD D3-differentiated cells.

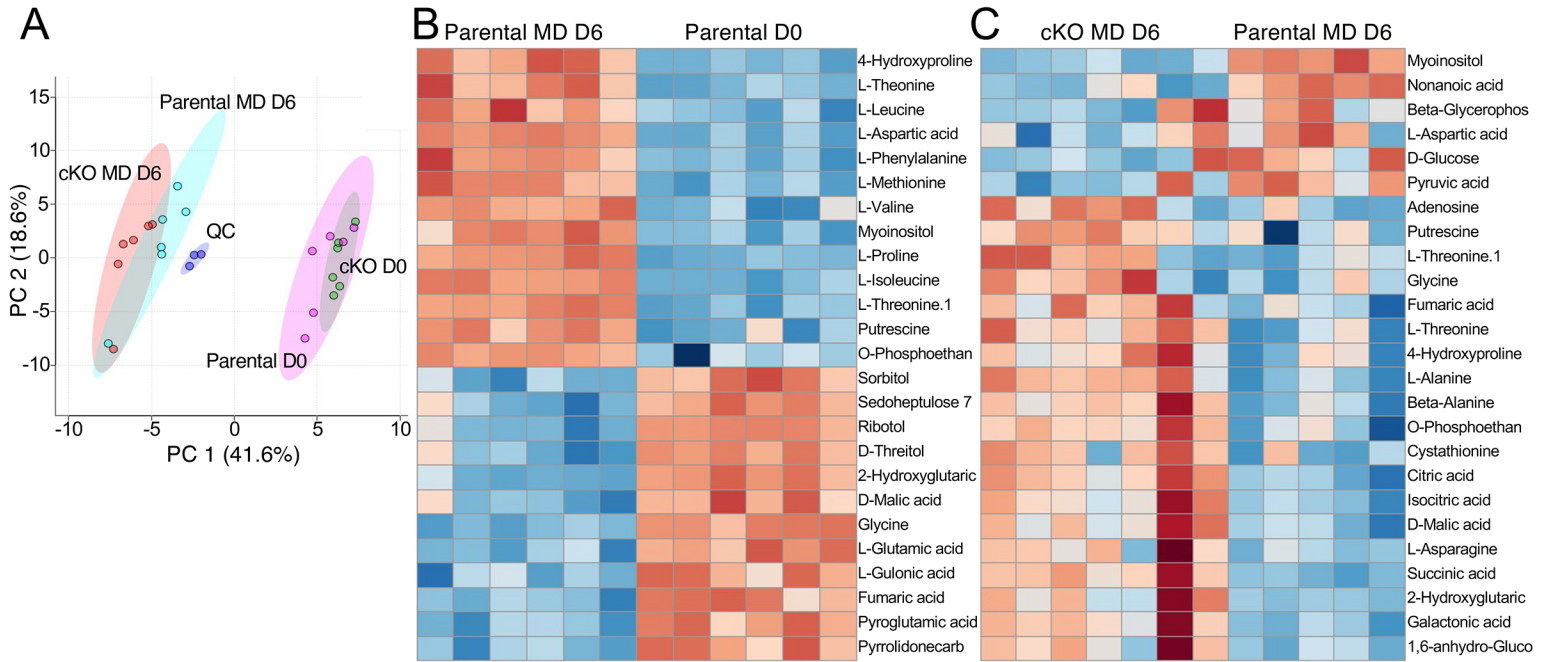

**Figure S4. Metabolic profiling of parental and cKO ESCs and MD-differentiated cells.**

(A) PCA plot of parental and cKO metabolic profiles.

(B) Heatmap of metabolites that change with MD differentiation of parental cells.

(C) Heatmap showing differential metabolites between parental and cKO cells at MD D6. 6 biological replicates were used for each condition.
